# Supplementary material for: Resveratrol improves fungal ribosylation capacity through a unique mechanism
Source: Royal Society of Chemistry journal article supplement (doi:10.1039/c4ra12851f), 2014-12-05

# Supporting Information

## Resveratrol Improves Fungal Ribosylation Capacity through a Unique Mechanism

Guo-Yan Zhao<sup>1,2</sup>, Jing-Yang Fan<sup>1</sup>, Cheng-Pin Hua<sup>1</sup>, Wei Yan<sup>1</sup>, Chao-Jun Chen<sup>1</sup>,  
Yan-Hua Lu<sup>2</sup>, Rui-Hua Jiao<sup>1\*</sup>, Ren-Xiang Tan<sup>1\*</sup>

*1.State Key Laboratory of Pharmaceutical Biotechnology, Nanjing University, Nanjing 210093, P. R.  
China*

*2. State Key Laboratory of Bioreactor Engineering, East China University of Science and Technology,  
Shanghai, 200000, P. R. China*

### Table of Contents

|                         |     |
|-------------------------|-----|
| Structure Determination | S2  |
| Experimental Procedures | S3  |
| References              | S4  |
| Supplementary Figures   | S5  |
| Supplementary Tables    | S7  |
| NMR Spectra             | S15 |

## Structure Determination

Compound **1** was obtained as an amorphous white powder and was shown to possess a molecular formula of  $C_{19}H_{20}O_7$  as determined by HR-ESI-MS (found: 383.1106, calcd.: 383.1101). The  $^1H$  NMR and  $^1H$ - $^1H$  COSY spectra of **1** showed the presence of a 1,3,5 trisubstituted benzene ring [ $\delta_H$  6.67 (1H, br t,  $J=2.1$  Hz, H-2),  $\delta_H$  6.57 (1H, br t,  $J=2.1$  Hz, H-4), and  $\delta_H$  6.38 (1H, br t,  $J=2.1$  Hz, H-6)], a *p*-substituted benzene ring [ $\delta_H$  7.40 (2H, d,  $J=8.8$  Hz, H-2' and H-6') and  $\delta_H$  6.76 (2H, d,  $J=8.8$  Hz, H-3' and H-5')], and a *trans* double bond [ $\delta_H$  6.87 (1H, d,  $J=16.4$  Hz), H-7] and  $\delta_H$  7.00 (1H, d,  $J=16.4$  Hz), H-8], suggesting the presence of a resveratrol moiety<sup>1</sup>. Additionally, a ribose residue was determined by comparing the its  $^1H$  and  $^{13}C$  NMR data with those of methyl ribofuranosides and asperflavin ribofuranoside.<sup>1</sup> The connection between the ribose and resveratrol was established by the key HMBC correlation from H-1'' ( $\delta_H$  5.54) to C-3 ( $\delta_C$  158.44). The sugar moiety was further determined as  $\alpha$ -D-ribofuranose by comparison of the  $J_{1'',2''}$  value (4.8 Hz) with those of the methyl- $\alpha$ -D-ribofuranoside  $J_{1,2}$  (4.3 Hz) and methyl-D-ribofuranoside  $J_{1,2}$  (1.2 Hz).<sup>2</sup> Thus, structure of **1** was demonstrated to be 3-*O*- $\alpha$ -D-ribosyl-resveratrol.

Compound **2** was obtained as an amorphous white powder, possessed the same formula as **1**. The  $^1H$  NMR spectrum of **2** indicated that it was an isomer of **1**. The chemical shifts and coupling relationships of aromatic protons in **1** were almost identical to those of resveratrol, suggesting the 4-*O*-ribosylation, which was further supported by the HMBC correlation of H-1'' ( $\delta$  5.65) with C-4' ( $\delta$  158.1). The  $J_{1'',2''}$  value (4.4 Hz) indicated the  $\alpha$  configuration of C-1'. Thus, structure of **2** was clarified to be 4'-*O*- $\alpha$ -D-ribosyl-resveratrol.<sup>2</sup>

Compound **3**, a light yellow amorphous powder, had the molecular formula  $C_{17}H_{20}O_9$ , as determined by positive HR-ESI-MS ( $m/z$  369.1177 [ $M + H$ ]<sup>+</sup>; calcd 369.1180). The  $^1H$  NMR spectrum revealed a ribosyl residue evidenced from the anomeric proton at  $\delta_H$  5.54 ( $J=4.8$  Hz) and five multiplets at  $\delta_H$  4.24, 4.17, 4.18 and 3.68 and 3.54. The  $^1H$  NMR spectrum of **3** suggested that it was a riboside of orthosporin.<sup>3</sup> The ribosyl group was shown to anchor on C-6 ( $\delta_C$  165.5) by the HMBC correlation of this carbon with the anomeric proton (H-1'). Thus, the structure of **3** was established as 6-*O*- $\alpha$ -D-ribosyl-orthosporin.

Compound **4** was afforded as an amorphous light yellow powder. Its molecular formula was determined to be C<sub>17</sub>H<sub>20</sub>O<sub>8</sub> according to the protonated molecular ion at *m/z* 353.1239 (353.1236 calcd. for C<sub>17</sub>H<sub>21</sub>O<sub>8</sub>) in its HR-ESI-MS. The <sup>1</sup>H NMR spectrum of compound **4** showed resonances assignable to a pair of *meta*-coupled aromatic protons at δ<sub>H</sub> 6.67 (1H, d, *J* = 2.0 Hz, H-8) and 6.47 (1H, d, *J* = 2.0 Hz, H-6), a separate olefinic proton at δ<sub>H</sub> 6.13 (1H, s, H-3), a set of protons for propyl vinyl moiety at δ<sub>H</sub> 2.66 (2H, t, *J* = 7.6 Hz, H-11), 1.79 (2H, qt, *J* = 7.6 Hz, H-12) and 1.01 (3H, t, *J* = 7.4 Hz, H-13). The <sup>1</sup>H and <sup>13</sup>C NMR data of **4** were similar to those of 5,7-dihydroxy-2-propylchromone 7-*O*-β-D-glucopyranoside,<sup>4</sup> but their sugar moieties were different. As in case of **2**, the signals between δ<sub>H</sub> 3.6 and 5.8 indicated the presence of a ribose residue. Similarly, the *J*<sub>1',2'</sub> value (4.4 Hz) demonstrated an α-configuration of the anomeric carbon (C-1'). Thus, structure of **4** was elucidated as 7-*O*-α-D-ribosyl-5-hydroxy-2-propylchromone.

Compound **5**, a light yellow amorphous powder, had the molecular formula C<sub>15</sub>H<sub>20</sub>O<sub>8</sub>, as determined by its HR-ESI-MS (*m/z* 329.1230 [M + H]<sup>+</sup>; calcd. 329.1231). The <sup>1</sup>H NMR spectrum of **5** indicated a 1,2,3,5-tetrasubstituted benzene ring (displaying two-protons singlets at δ<sub>H</sub> 6.16), a propyl moiety at δ<sub>H</sub> 3.07 (2H, t, *J* = 7.2 Hz, H-8), 1.68 (2H, qt, *J* = 7.2 Hz, H-9) and 0.92 (3H, t, *J* = 7.2 Hz, H-10) and a set of protons assignable for an α-D-ribosyl residue. The <sup>1</sup>H NMR signals due to benzene and propyl moieties resembled those of phlorobutyrophenone, and the symmetry of benzene ring suggested the ribosyl group was anchored on C-4. Thus, the structure of **5** was assigned as 4-*O*-α-D-ribosyl-phlorobutyrophenone.<sup>5</sup>

## Experimental Procedures

**Chemicals:** Resveratrol, UDP, NAD, NMN, AMP and ADP were purchased from Aladdin. SDS was purchased from Sangon Biotech.

**NMR Spectroscopy:** The <sup>1</sup>H and <sup>13</sup>C NMR spectra were acquired on a Bruker Advance 400 MHz or a Bruker DRX 500 MHz NMR spectrometers equipped with a 5 mm probe head.

**Phylogenetic Analysis:** To identify the pgps subfamily of *Daldinia eschscholzii*, sequences of ABC transporter proteins<sup>6</sup> representing different subfamilies were selected (Table S4) and aligned with

*pgp3*, 6, 7 11 using Clustal W.<sup>7</sup> A phylogenetic tree was then constructed with the alignment by the MEGA program (version 5.10) and the neighbor-joining method (Figure S1).<sup>8</sup>

## References

- 1 D. Lee, M. Cuendet, J. S. Vigo, J. G. Graham, F. Cabieses, H. H. Fong, J. M. Pezzuto, A. D. Kinghorn, *Org. Lett.*, 2001, **3**, 2169-2171.
- 2 L. Du, T. Zhu, H. Liu, Y. Fang, W. Zhu, Q. Gu, *J. Nat. Prod.*, 2008, **71**, 1837-1842.
- 3 Y. L. Zhang, J. Zhang, N. Jiang, Y. H. Lu, L. Wang, S. H. Xu, W. Wang, G. F. Zhang, Q. Xu, H. M. Ge, J. Ma, Y. C. Song, R. X. Tan, *J. Am. Chem. Soc.*, 2011, **133**, 5931-5940; V. H. Deshpande, R. Beena, R. A. Khan *Tetrahedron*, 1996, **52**, 7159-716.
- 4 H. Kato, W. Li, M. Koike, Y. Wang, K. Koike, *Phytochemistry*, 2010, **71**, 1925–1929.
- 5 M.L. Bolte, W. D. Crow, N. Takahashi, A. Sakurai, M. Uji-ie, Yoshida, *Agric. Biol Chern.*, 1985, **49**, 761 -768.
- 6 A. Kovalchuk, A. J. M. Driessen, *BMC Genomics*, 2010, **11**, 177. DOI: 10.1186/1471-2164-11-177.
- 7 M. A. Larkin, G. Blackshields, N. P. Brown, R. Chenna, P. A. McGettigan, H. McWilliam, F. Valentin, I. M. Wallace, A. Wilm, R. Lopez, J. D. Thompson, T. J. Gibson, D. G. Higgins, *Bioinformatics*, 2007, **23**, 2947-2948.
- 8 K. Tamura, D. Peterson, N. Peterson, G. Stecher, M. Nei, S. Kumar, *Mol. Biol. Evol.*, 2011, **28**, 2731-2739.

## Supplementary Figures

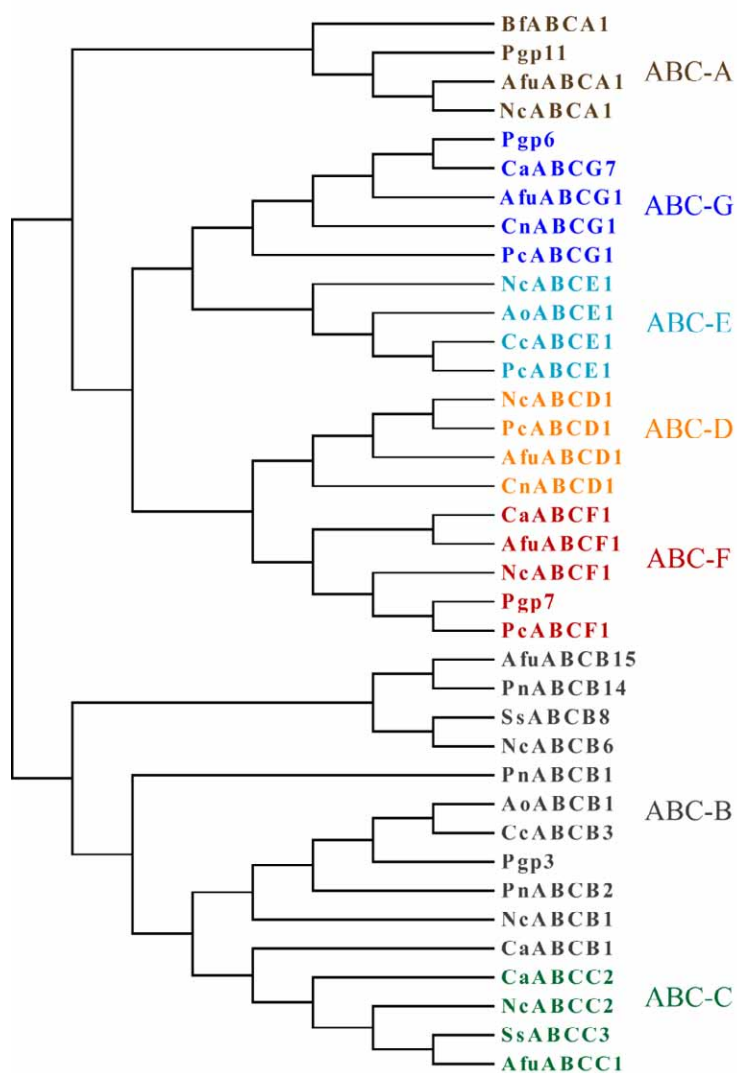

**Figure S1. Phylogenetic tree of fungal ABC transporter proteins.** Pgps in *D. eschscholzii* and other homologous ABC transporter proteins (details in Table S3) were aligned with Clustal W.<sup>[7]</sup> The phylogenetic tree was subsequently generated using the neighbour-joining method with MEGA 5.10<sup>[8]</sup> software package.

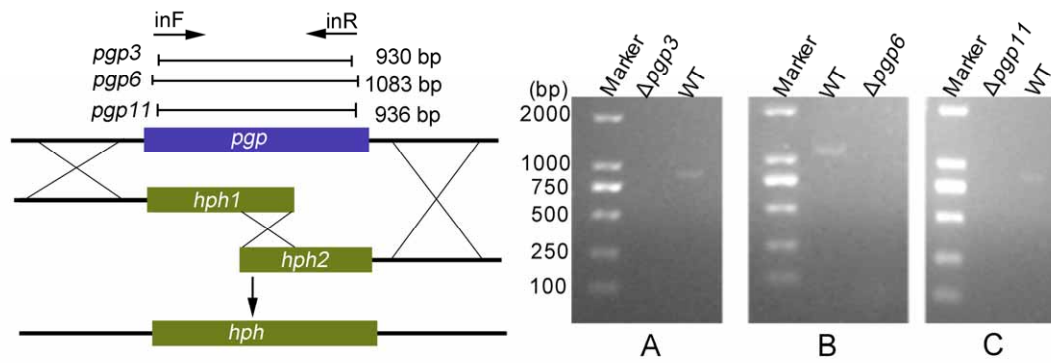

**Figure S2. PCR confirmation of deletions of (A) *pgp3*, (B) *pgp6*, and (C) *pgp11* in *D. eschscholzii*.** The primers (*inF* and *inR*) used for PCR analysis are list in Table S2. *pgp*, p-glycoprotein gene; *hph*, hygromycin phosphotransferase gene;  $\Delta pgp3$ , the strain with *pgp3* gene deleted;  $\Delta pgp6$ , the strain with *pgp6* gene deleted;  $\Delta pgp11$ , the strain with *pgp11* gene deleted; WT, wild-type strain.

## Supplementary Tables

**Table S1. <sup>1</sup>H and <sup>13</sup>C NMR data of 1 and 2.**

| position | <b>1</b> <sup>a</sup> |                                   | <b>2</b> <sup>b</sup> |                                   |
|----------|-----------------------|-----------------------------------|-----------------------|-----------------------------------|
|          | $\delta_C$            | $\delta_H$ (mult. <i>J</i> in Hz) | $\delta_C$            | $\delta_H$ (mult. <i>J</i> in Hz) |
| 1        | 139.7                 |                                   | 140.5                 |                                   |
| 2        | 106.3                 | 6.67 (s)                          | 105.7                 | 6.55 (d, 2.4)                     |
| 3        | 158.4                 |                                   | 159.6                 |                                   |
| 4        | 103.0                 | 6.38 (t, 2.0)                     | 102.8                 | 6.27 (t, 2.4)                     |
| 5        | 158.9                 |                                   | 159.6                 |                                   |
| 6        | 107.2                 | 6.57 (s)                          | 105.7                 | 6.55 (d, 2.4)                     |
| 7        | 125.8                 | 6.87 (d, 16.4)                    | 128.2                 | 6.94 (d, 16)                      |
| 8        | 128.4                 | 7.00 (d, 16.4)                    | 128.6                 | 7.05 (d, 16)                      |
| 1'       | 128.9                 |                                   | 132.2                 |                                   |
| 2'       | 128.4                 | 7.40 (d, 8.8)                     | 128.4                 | 7.51 (d, 8.8)                     |
| 3'       | 116.0                 | 6.76 (d, 8.4)                     | 118.0                 | 7.10 (d, 8.4)                     |
| 4'       | 158.0                 |                                   | 158.1                 |                                   |
| 5'       | 116.0                 | 6.76 (d, 8.4)                     | 118.0                 | 7.10 (d, 8.4)                     |
| 6'       | 128.4                 | 7.40 (d, 8.8)                     | 128.4                 | 7.51 (d, 8.8)                     |
| 5-OH     |                       | 9.58 (s)                          |                       |                                   |
| 4'-OH    |                       | 9.42 (s)                          |                       |                                   |
| 1''      | 100.8                 | 5.54 (d, 4.8)                     | 101.9                 | 5.65 (d, 4.4)                     |
| 2''      | 71.9                  | 4.04 (m)                          | 73.0                  | 4.23 (4.4, 6.4)                   |
| 3''      | 69.8                  | 3.92 (m)                          | 70.9                  | 4.15 (m)                          |
| 4''      | 86.5                  | 3.97 (m)                          | 87.7                  | 4.16 (m)                          |
| 5''      | 62.1                  | 3.48 (d, 4.0)                     | 62.1                  | 3.66 (d, 4.0)                     |
| 2''-OH   |                       | 4.61 (d, 8.4)                     |                       |                                   |
| 3''-OH   |                       | 4.85 (d, 5.2)                     |                       |                                   |
| 5''-OH   |                       | 4.78 (t, 5.2)                     |                       |                                   |

<sup>a</sup> In DMSO-*d*<sub>6</sub> at 400 MHz. <sup>b</sup> In acetone-*d*<sub>6</sub> at 500 MHz. <sup>c</sup> In acetone-*d*<sub>6</sub> at 400 MHz.

**Table S2. <sup>1</sup>H and <sup>13</sup>C NMR data of 3–5 (400 MHz, acetone-*d*<sub>6</sub>).**

| position | 3          |                                              | 4          |                                              | 5                                            |
|----------|------------|----------------------------------------------|------------|----------------------------------------------|----------------------------------------------|
|          | $\delta_C$ | $\delta_H$ (mult. <i>J</i> )                 | $\delta_C$ | $\delta_H$ (mult. <i>J</i> )                 | $\delta_H$ (mult. <i>J</i> )                 |
| 1        | 167.1      |                                              |            |                                              |                                              |
| 2        |            |                                              | 171.9      |                                              |                                              |
| 3        | 156.6      |                                              | 108.7      | 6.13 (s)                                     | 6.16 (s)                                     |
| 4        | 106.6      | 6.52 (s)                                     | 183.3      |                                              |                                              |
| 5        | 104.3      | 6.67 (d, 2.0)                                | 162.4      |                                              | 6.16 (s)                                     |
| 6        | 165.5      |                                              | 100.8      | 6.47 (d, 2.0)                                |                                              |
| 7        | 103.3      | 6.63 (d, 2.0)                                | 164.0      |                                              |                                              |
| 8        | 163.8      |                                              | 95.7       | 6.67 (d, 2.0)                                | 3.07 (t, 7.2)                                |
| 9        | 101.1      |                                              | 158.6      |                                              | 1.68 (qt, 7.2)                               |
| 10       | 140.6      |                                              | 106.3      |                                              | 0.96 (t, 7.2)                                |
| 11       | 43.7       | 2.60 (dd, 7.2, 14.4)<br>2.64 (dd, 5.6, 14.4) | 36.4       | 2.66 (t, 7.6)                                |                                              |
| 12       | 65.5       | 4.18 (m)                                     | 20.8       | 1.79 (qt, 7.6)                               |                                              |
| 13       | 23.5       | 1.24 (d, 7.0)                                | 13.7       | 1.01 (t, 7.6)                                |                                              |
| 1'       | 101.3      | 5.80 (d, 4.4)                                | 101.5      | 5.78 (d, 4.4)                                | 5.67 (d, 4.4)                                |
| 2'       | 73.0       | 4.24 (dd, 4.8, 7.0)                          | 73.1       | 4.29 (m)                                     | 4.22 (m)                                     |
| 3'       | 70.7       | 4.17 (m)                                     | 70.7       | 4.17 (m)                                     | 4.12 (m)                                     |
| 4'       | 88.3       | 4.18 (m)                                     | 88.3       | 4.19 (m)                                     | 4.13 (m)                                     |
| 5'       | 62.8       | 3.68 (dd, 3.6, 12.0)<br>3.64 (dd, 3.6, 12.0) | 62.9       | 3.70 (dd, 3.6, 12.0)<br>3.66 (dd, 3.6, 12.0) | 3.68 (dd, 3.6, 12.0)<br>3.63 (dd, 3.6, 12.0) |

**Table S3. Primers used in this paper.**

| Primers for qRT-PCR |                            |
|---------------------|----------------------------|
| Pgp1F               | 5'-AGTCTGAAAGTTGCCGAGAT-3' |
| Pgp1R               | 5'-CGTAGAACGTGAGTTGGGAG-3' |
| Pgp2F               | 5'-TGCTGGCTATGTACCTGACG-3' |
| Pgp2R               | 5'-CTAGCATAATTTGGCCGTGA-3' |
| Pgp3F               | 5'-CTGGTTAGTGCGACCCTCTG-3' |
| Pgp3R               | 5'-CTCTGCTCCGCCTCTATGT-3'  |
| Pgp4F               | 5'-GAGTTCATTTCTTCCCTTCC-3' |
| Pgp4R               | 5'-TACTGCGATTGTGATTCTGT-3' |
| Pgp5F               | 5'-CAGGGCTCTTCAGGGTCGTA-3' |



---

|        |                              |
|--------|------------------------------|
| Pgp5R  | 5'-TGTCGGGAGTAATAGGCACA-3'   |
| Pgp6F  | 5'-AGTCCCATTCTTACCCTATT-3'   |
| Pgp6R  | 5'-AACCGTTGTCTCATTTCATT-3'   |
| Pgp7F  | 5'-ATCCCTGTTATTTCCGAGTC-3'   |
| Pgp7R  | 5'-CCATCAGAGCCAAAGTAGGT-3'   |
| Pgp8F  | 5'-TCGGCTGTGAAGCGATTAGA-3'   |
| Pgp8R  | 5'-TGAGTATCCTCGGGCTGGTT-3'   |
| Pgp9F  | 5'-GCAGGTGACAGGCTACAAGG-3'   |
| Pgp9R  | 5'-GCGAAAGATAGACCGAAACG-3'   |
| Pgp10F | 5'-CCGTGCGGAGGGAGTGAC-3'     |
| Pgp10R | 5'-CGGGACGAGATGGGTAGG-3'     |
| Pgp11F | 5'-TCTACTTGCCGACCAT-3'       |
| Pgp11R | 5'-CTGCTGACTCAAGGGA-3'       |
| Pgp12F | 5'-GTCCATTCCTCCGCTACTTT-3'   |
| Pgp12R | 5'-ACTCGGGTATTCACATCCTG-3'   |
| AT1F   | 5'-TCCTCTGCGAAGCGGAACT-3'    |
| AT1R   | 5'-CACCCTTTAACGATGGATGAAC-3' |
| AT2F   | 5'-TTCGGCGAGCCTCTATTC-3'     |
| AT2R   | 5'-TCGTCTATCGGCGTGTCC-3'     |
| AT3F   | 5'-CCGACTGTGCTCTAATCTC-3'    |
| AT3R   | 5'-CTGGATGCTCCCTGGTAA-3'     |
| AT4F   | 5'-CGACCACGACCGACTACAA-3'    |
| AT4R   | 5'-TCACCGCGATTTCCTTCT-3'     |
| AT5F   | 5'-GGCAAGGCATCCAAAGCT-3'     |
| AT5R   | 5'-CTCGCCAACCTCCTCCAC-3'     |
| AT6F   | 5'-CCGCCGTATCAACAAGCC-3'     |
| AT6R   | 5'-CATCCCAAGAAACGCCTA-3'     |
| PT1F   | 5'-GCCTTACGGTTCGGGTCT-3'     |
| PT1R   | 5'-TCAGCCAGTTCGCTTGTG-3'     |

---

---

|         |                            |
|---------|----------------------------|
| PT2F    | 5'-AGAGTCGAGCGCCTATCT-3'   |
| PT2R    | 5'-GCAAGGTTCTCCCTAATCC-3'  |
| PT3F    | 5'-CCTGCTAAACAACGAACTAC-3' |
| PT3R    | 5'-CTTCCTTCCAACGACCAC-3'   |
| PT4F    | 5'-TACCTGACTTCCCTATTCCC-3' |
| PT4R    | 5'-GCTTCCAGACCCACTATGA-3'  |
| PT5F    | 5'-CGAATGGTTTATGGGTATT-3'  |
| PT5R    | 5'-TTGAGGCGGTATGTTTGG-3'   |
| PT6F    | 5'-AAAGCCCATCGCTACTGT-3'   |
| PT6R    | 5'-TCAGCCCTTCTCAACAA-3'    |
| PT7F    | 5'-TTTACCTGGCTCTATGGG-3'   |
| PT7R    | 5'-CTCGCTGTCGCTATCTGT-3'   |
| PT8F    | 5'-ACCTATTGGAGGGTGCTG-3'   |
| PT8R    | 5'-TGGTCGTATCCCGTTATT-3'   |
| PT9F    | 5'-CCCCAACATCCCTATTCA-3'   |
| PT9R    | 5'-ATGCGCTTACCAACCAAG-3'   |
| PT10F   | 5'-CACAGCCGTGCTTCCATT-3'   |
| PT10R   | 5'-CTCGCAAGGTCGGTCTCC-3'   |
| 18sF    | 5'-GTCCGAATAACCGAAGCG-3'   |
| 18sR    | 5'-GCCAGCGTACTGCCAAAG-3'   |
| Actin1F | 5'-GCCTACCACGATGTTCAA-3'   |
| Actin1R | 5'-ATAATGCCGAAGCGAAAG-3'   |
| Actin2F | 5'-CAGACGCTATCAACAGGA-3'   |
| Actin2R | 5'-CTCAAACCAGCAAGAATG-3'   |

---

Primers for knockout of *pgp* genes by amplification of split-marker cassettes

---

|          |                                                 |
|----------|-------------------------------------------------|
| Pgp3-sp1 | 5'-CAGGCTTACGGACACCAT-3'                        |
| Pgp3-sp2 | 5'-GCTCCTTCAATATCATCTTCTGCGAAAGGCAAACACCAAT -3' |
| Pgp3-sp3 | 5'-ATTGGTGTTTGCCTTTCGCAGAAGATGATATTGAAGGAGC-3'  |
| Pgp3-sp4 | 5'-GCTCCATACAAGCCAACCAC-3'                      |

---

---

|           |                                                    |
|-----------|----------------------------------------------------|
| Pgp3-sp5  | 5'- CCTTCCTCCCTTTATTTTCAGA-3'                      |
| Pgp3-sp6  | 5'-GGCTGAGGATCTCGGAAGGGATCCTCTAGAAAGAAGGATTAC-3'   |
| Pgp3-sp7  | 5'-GTAATCCTTCTTTCTAGAGGATCCCTTCCGAGATCCTCAGCC-3'   |
| Pgp3-sp8  | 5'-GCGAGGTGCCGTATTCTA-3'                           |
| Pgp6-sp1  | 5'-CCGTGATACGTTTCGTGGTA-3'                         |
| Pgp6-sp2  | 5'-GCTCCTTCAATATCATCTTCTGCAACCCTGGATTGAAGTG-3'     |
| Pgp6-sp3  | 5'-CACTTCAATCCAGGGTTGCAGAAGATGATATTGAAGGAGC-3'     |
| Pgp6-sp4  | 5'-GCTCCATACAAGCCAACCAC-3'                         |
| Pgp6-sp5  | 5'-CCTTCCTCCCTTTATTTTCAGA-3'                       |
| Pgp6-sp6  | 5'-CCTATCAACGGCACTTCAGGATCCTCTAGAAAGAAGGATTAC-3'   |
| Pgp6-sp7  | 5'-GTAATCCTTCTTTCTAGAGGATCCTGAAGTGCCGTTGATAGG-3'   |
| Pgp6-sp8  | 5'-TTTGGACTCGCATGATAT-3'                           |
| Pgp7-sp1  | 5'-TGATGCCTAAATGGGACT-3'                           |
| Pgp7-sp2  | 5'-GCTCCTTCAATATCATCTTCTGGAACAAGGAGCCAGAATA-3'     |
| Pgp7-sp3  | 5'-TATTCTGGCTCCTTGTTCAGAAAGATGATATTGAAGGAGC-3'     |
| Pgp7-sp4  | 5'-GCTCCATACAAGCCAACCAC-3'                         |
| Pgp7-sp5  | 5'-CCTTCCTCCCTTTATTTTCAGA-3'                       |
| Pgp7-sp6  | 5'-GAGCAAGCAGCGAGGACAGGATCCTCTAGAAAGAAGGATTAC-3'   |
| Pgp7-sp7  | 5'-GTAATCCTTCTTTCTAGAGGATCCTGTCCTCGCTGCTTGCTC-3'   |
| Pgp7-sp8  | 5'-CATGCCATGCGTCTGTCT-3'                           |
| Pgp11-sp1 | 5'-CGGCTCGTTTATTCGTCC-3'                           |
| Pgp11-sp2 | 5'-GCTCCTTCAATATCATCTTCTGCAGGGCTCGCAATCAGTC-3'     |
| Pgp11-sp3 | 5'-GACTGATTGCGAGCCCTGCAGAAGATGATATTGAAGGAGC-3'     |
| Pgp11-sp4 | 5'-GCTCCATACAAGCCAACCAC-3'                         |
| Pgp11-sp5 | 5'-CCTTCCTCCCTTTATTTTCAGA-3'                       |
| Pgp11-sp6 | 5'-CTCCACGCCCACTTCTTGGATCCTCTAGAAAGAAGGATTAC-3'    |
| Pgp11-sp7 | 5'-GTAATCCTTCTTTCTAGAGGATCCAAGAAGTGGTGGGCGTGGAG-3' |
| Pgp11-sp8 | 5'-TGGGCGGTCTTCCTTTTCG-3'                          |

---

Primers for diagnostic PCR of deleted *pgp* genes

---

---

|           |                            |
|-----------|----------------------------|
| Pgp3-inF  | 5'-GAAAGGAGCCACAAAGCG-3'   |
| Pgp3-inR  | 5'-CTGCGGAAGTTCCACGAT-3'   |
| Pgp6-inF  | 5'-CGCCGAGATCAGATGTTT-3'   |
| Pgp6-inR  | 5'-ATTCAGTGGCACGGTTTT-3'   |
| Pgp7-inF  | 5'-GCAACTGTACCTTCTCCCTT-3' |
| Pgp7-inR  | 5'-ATGCGTGCTGCTTGATGT-3'   |
| Pgp11-inF | 5'-GCAGCATTGGAAGTGAGC-3'   |
| Pgp11-inR | 5'-AAACGAGGAAGAGGTAAGG-3'  |

---

**Table S4. Gene informations of ABC transporters in phylogenetic analysis.**

---

| <b>Proposed name</b> | <b>Subfamily</b>           | <b>Genome locus</b> | <b>Species</b>                                                | <b>Genbank no.</b> |
|----------------------|----------------------------|---------------------|---------------------------------------------------------------|--------------------|
| NcABCE1              | ABC-E                      | NCU03061            | <i>Neurospora crassa</i><br>OR74A                             | EAA34633.2         |
| AoABCE1              | ABC-E                      | AO090038000399      | <i>Aspergillus oryzae</i><br>RIB40                            | BAE64192.1         |
| CcABCE1              | ABC-E                      | CC1G_07665          | <i>Coprinopsis cinerea</i><br>okayama7*130                    | EAU89439.2         |
| PcABCE1              | ABC-E                      | Pc16g04800          | <i>Penicillium</i><br><i>chrysogenum</i> Wisconsin<br>54-1255 | CAP93150           |
| AfuABCA1             | ABC-A                      | Afu5g09480          | <i>Aspergillus fumigatus</i><br>Af293                         | EAL91653           |
| NcABCA1              | ABC-A                      | NCU04021            | <i>Neurospora crassa</i><br>OR74A                             | EAA28400.1         |
| BfABCA1              | ABC-A                      | BC1G_11159          | <i>Botryotinia fuckeliana</i><br>B05.10                       | EDN32616           |
| PnABCB1              | ABC-B<br>(FL) <sup>a</sup> | SNOG_00742          | <i>Phaeosphaeria nodorum</i><br>SN15                          | EAT92237.1         |
| PnABCB2              | ABC-B                      | SNOG_02135          | <i>Phaeosphaeria nodorum</i>                                  | EAT90347.2         |

---

---

|           |                   |                |                                 |            |
|-----------|-------------------|----------------|---------------------------------|------------|
|           | (FL) <sup>α</sup> |                | SN15                            |            |
| NcABCB1   | ABC-B             | NCU06011       | <i>Neurospora crassa</i>        | EAA29583.1 |
|           | (FL) <sup>α</sup> |                | OR74A                           |            |
| AoABCB1   | ABC-B             | AO090001000021 | <i>Aspergillus oryzae</i>       | BAE56585.1 |
|           | (FL) <sup>α</sup> |                | RIB40                           |            |
| CcABCB3   | ABC-B             | CC1G_04855     | <i>Coprinopsis cinerea</i>      | EAU80745.2 |
|           | (FL) <sup>α</sup> |                | okayama 7*130                   |            |
| CaABCB1   | ABC-B             | CaO19.7440     | <i>Candida albicans</i>         | EAK97097.1 |
|           | (FL) <sup>α</sup> |                | SC5314                          |            |
| AfuABCB15 | ABC-B             | Afu6g12870     | <i>Aspergillus fumigatus</i>    | EAL89127.1 |
|           | (HT) <sup>β</sup> |                | Af293                           |            |
| PnABCB14  | ABC-B             | SNOG_15856     | <i>Phaeosphaeria nodorum</i>    | EAT76694.2 |
|           | (HT) <sup>β</sup> |                | SN15                            |            |
| SsABCB8   | ABC-B             | SS1G_03201     | <i>Sclerotinia sclerotiorum</i> | EDO00728.1 |
|           | (HT) <sup>β</sup> |                | 1980_UF-70                      |            |
| NcABCB6   | ABC-B             | NCU00010       | <i>Neurospora crassa</i>        | EAA27761.2 |
|           | (HT) <sup>β</sup> |                | OR74A                           |            |
| SsABCC3   | ABC-C             | SS1G_05336     | <i>Sclerotinia sclerotiorum</i> | EDO02859.1 |
|           |                   |                | 1980 UF-70                      |            |
| AfuABCC1  | ABC-C             | Afu1g10390     | <i>Aspergillus fumigatus</i>    | EAL90367.2 |
|           |                   |                | Af293                           |            |
| CaABCC2   | ABC-C             | CaO19.5100     | <i>Candida albicans</i>         | EAK98674.1 |
|           |                   |                | SC5314                          |            |
| NcABCC2   | ABC-C             | NCU03591       | <i>Neurospora crassa</i>        | EAA31399.1 |
|           |                   |                | OR74A                           |            |
| NcABCD1   | ABC-D             | NCU01751       | <i>Neurospora crassa</i>        | EAA27938.1 |
|           |                   |                | OR74A                           |            |
| PcABCD1   | ABC-D             | Pc13g11640     | <i>Penicillium</i>              | CAP92233.1 |
|           |                   |                | <i>chrysogenum</i> Wisconsin    |            |

---

---

|          |       |            |                                                                          |            |
|----------|-------|------------|--------------------------------------------------------------------------|------------|
|          |       |            | 54-1255                                                                  |            |
| CnABCD1  | ABC-D | CNA06310   | <i>Cryptococcus</i><br><i>neoformans</i> var.<br><i>neoformans</i> JEC21 | AAW41159.1 |
| AfuABCD1 | ABC-D | Afu1g04780 | <i>Aspergillus fumigatus</i><br>Af293                                    | EAL88189.1 |
| CaABCF1  | ABC-F | CaO19.2183 | <i>Candida albicans</i><br>SC5314                                        | EAK97015.1 |
| NcABCF1  | ABC-F | NCU04051   | <i>Neurospora crassa</i><br>OR74A                                        | EAA28430.1 |
| AfuABCF1 | ABC-F | Afu1g16440 | <i>Aspergillus fumigatus</i><br>Af293                                    | EAL90972.1 |
| PcABCF1  | ABC-F | Pc12g06650 | <i>Penicillium</i><br><i>chrysogenum</i> Wisconsin                       | CAP80292.1 |
|          |       |            | 54-1255                                                                  |            |
| CaABCG7  | ABC-G | CaO19.5958 | <i>Candida albicans</i><br>SC5314                                        | EAL04461.1 |
| AfuABCG1 | ABC-G | Afu1g14330 | <i>Aspergillus fumigatus</i><br>Af293                                    | EAL90765.1 |
| CnABCG1  | ABC-G | CNA07090   | <i>Cryptococcus</i><br><i>neoformans</i> var.<br><i>neoformans</i> JEC21 | AAW41207.1 |
| PcABCG1  | ABC-G | Pc12g00190 | <i>Penicillium</i><br><i>chrysogenum</i> Wisconsin                       | CAP79646.1 |
|          |       |            | 54-1255                                                                  |            |

---

<sup>a</sup> Full-size ABC-B protein. <sup>b</sup> Half-size ABC-B protein.

# NMR Spectra

$^1\text{H}$  NMR spectrum of **1**.

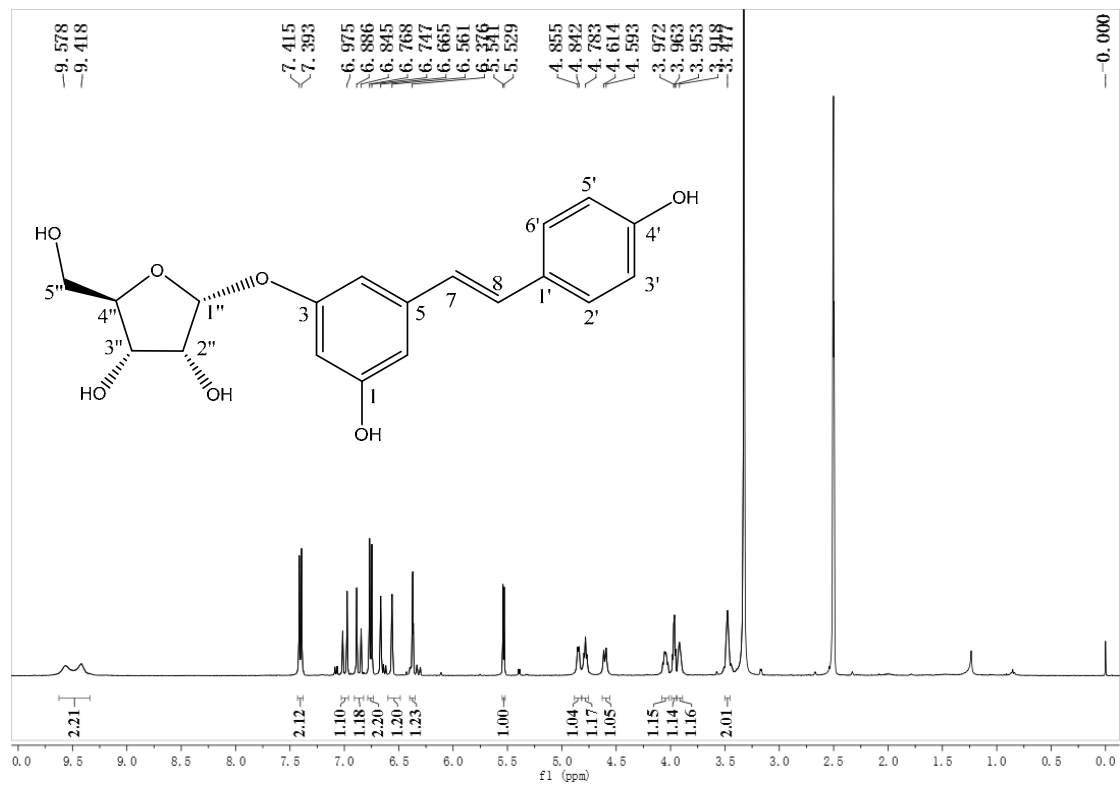

$^{13}\text{C}$  NMR spectrum of **1**.

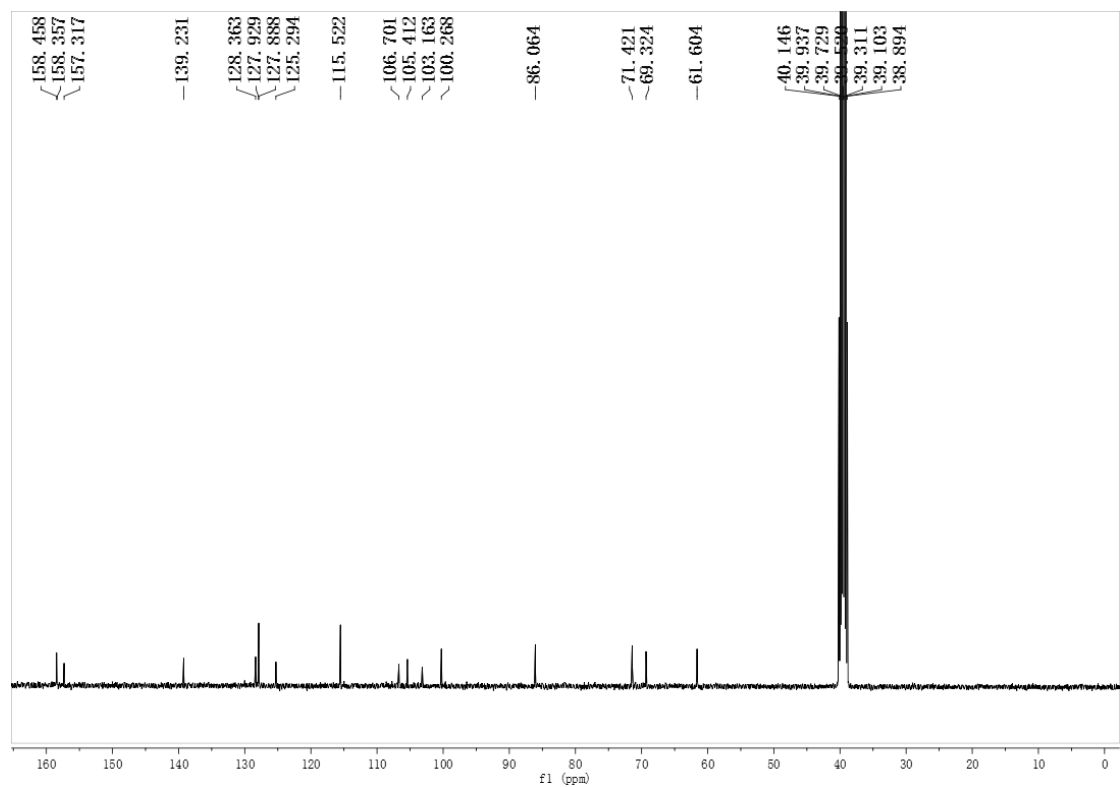

DEPT 135 spectrum of **1**.

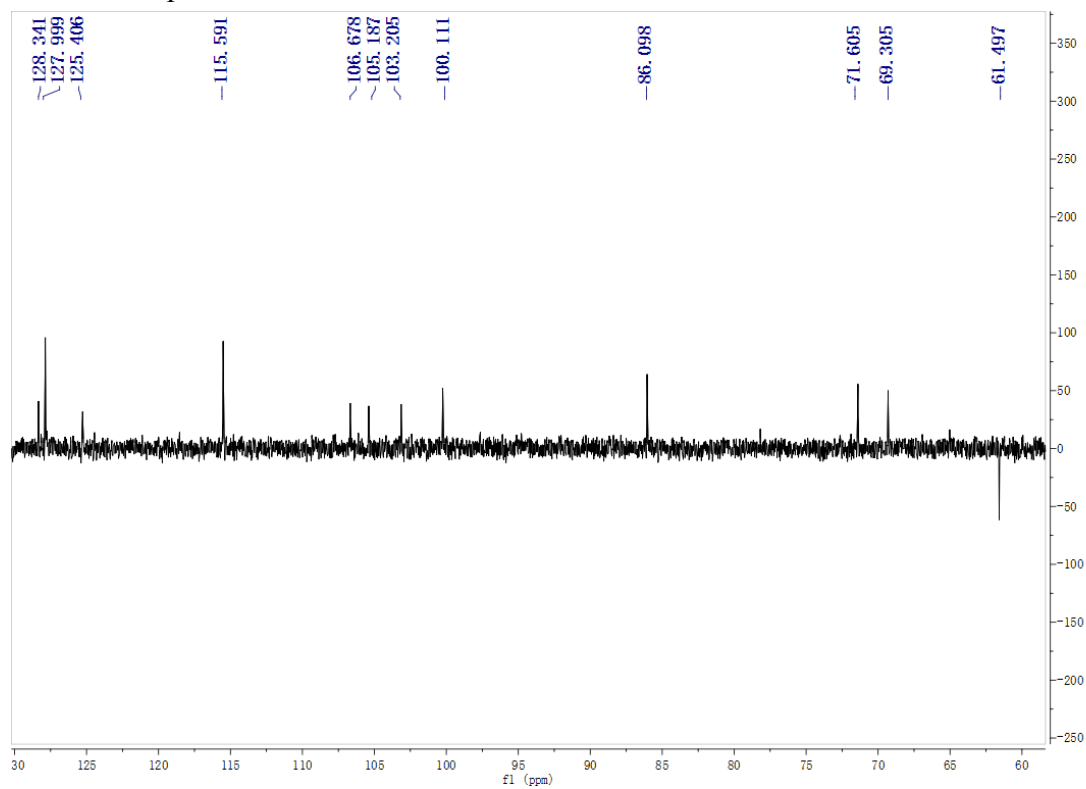

$^1\text{H}$ - $^1\text{H}$  COSY spectrum of **1**.

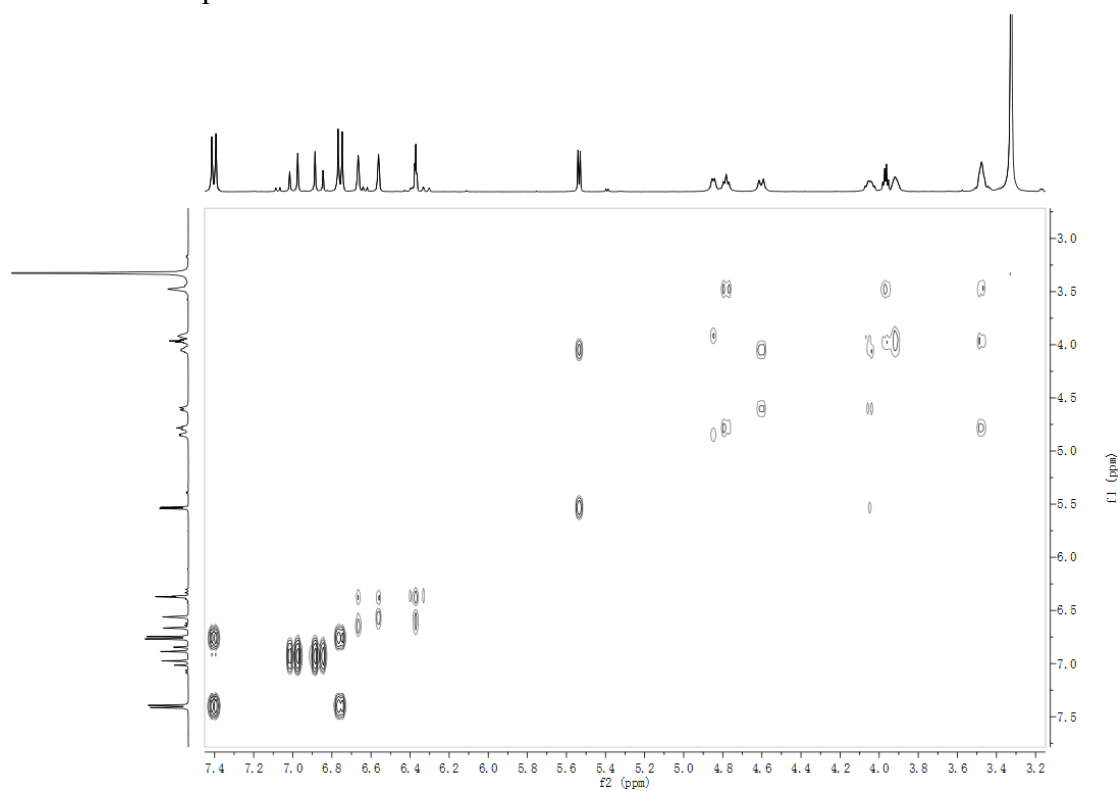

HMQC spectrum of **1**.



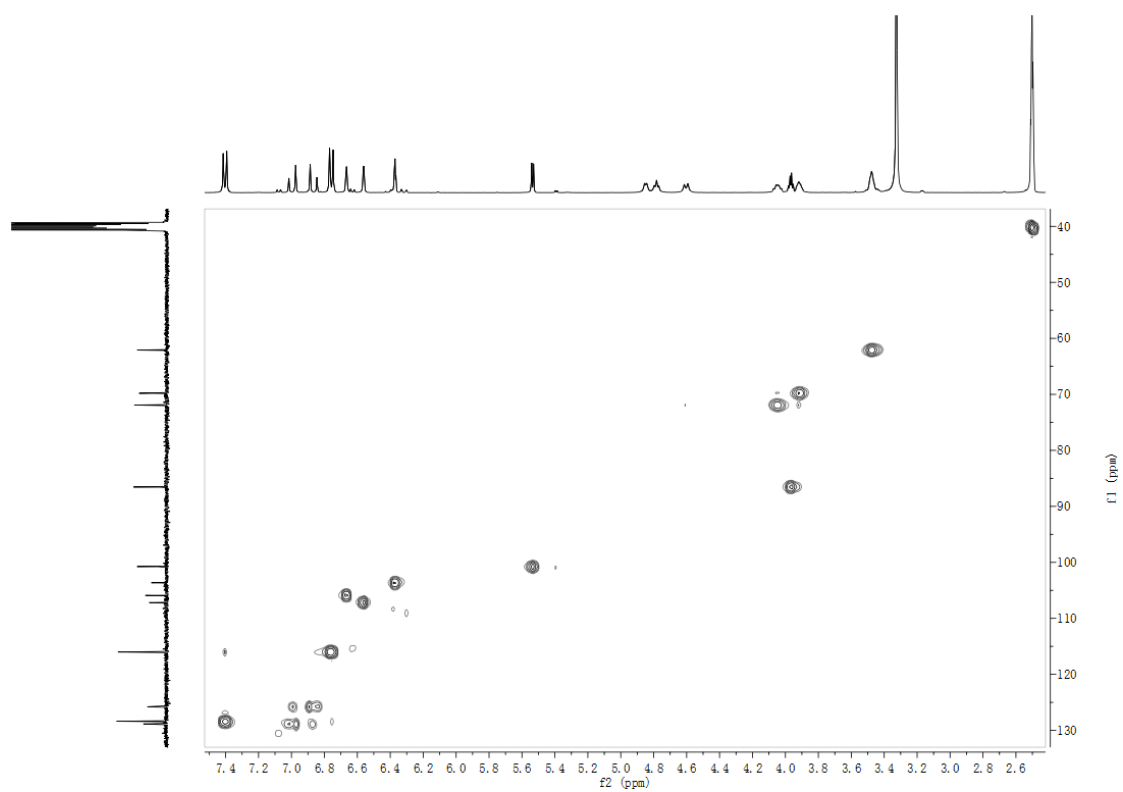

HMBC spectrum of **1**.

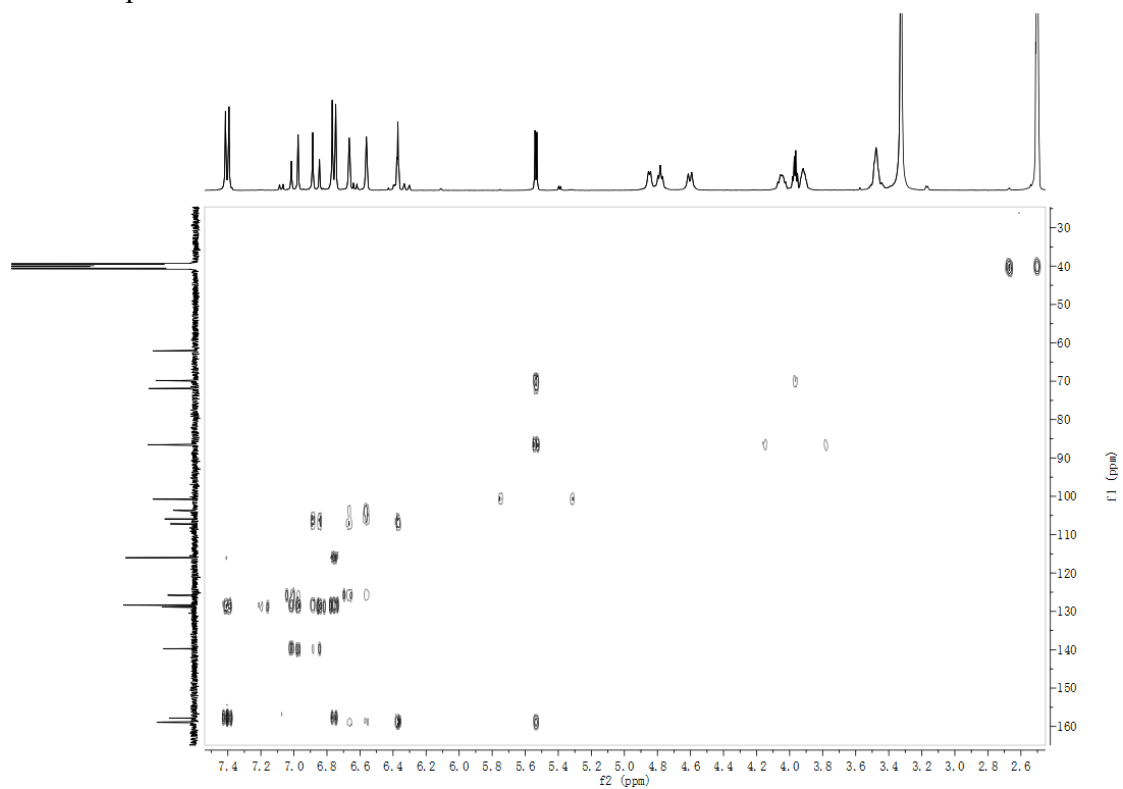

NOESY spectrum of **1**.

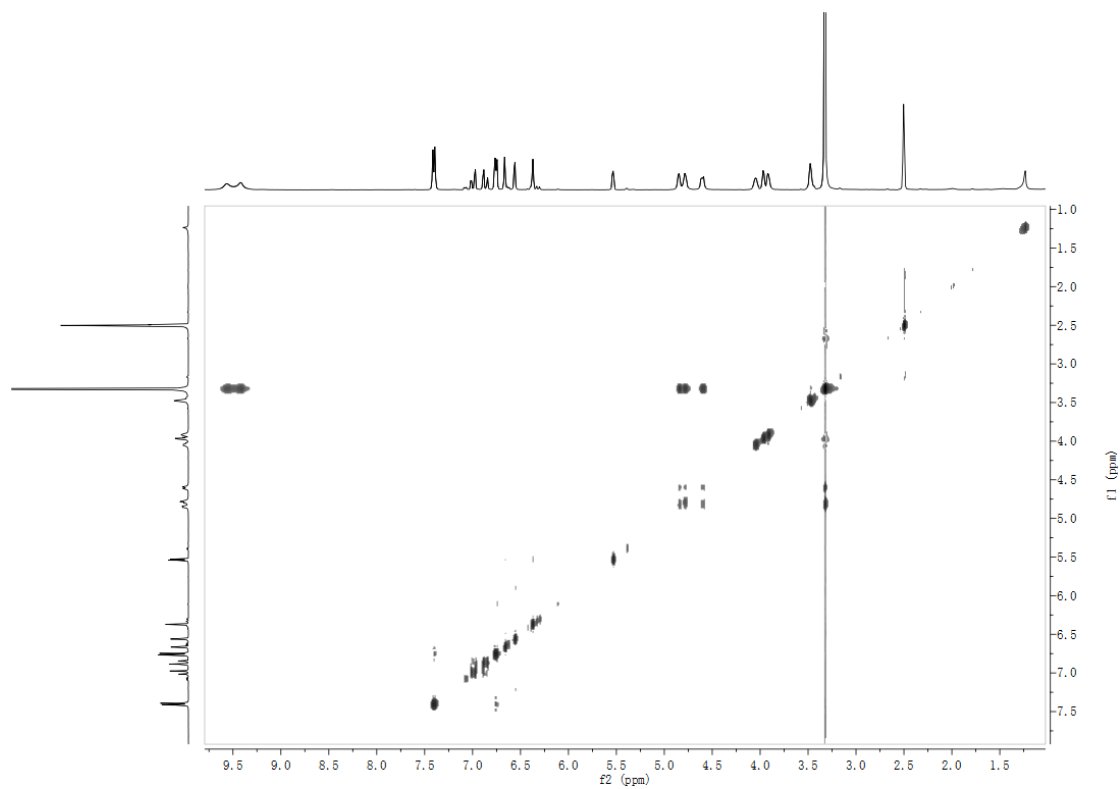

$^1\text{H}$  NMR spectrum of **2**.

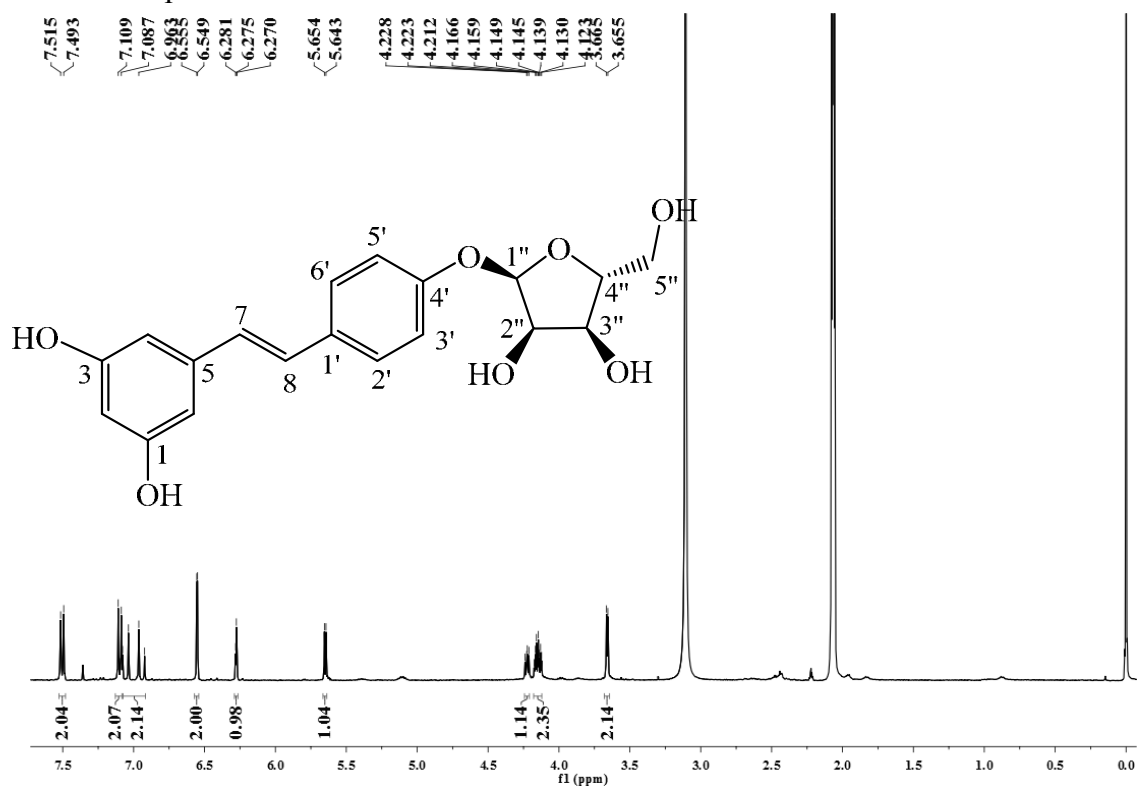

$^{13}\text{C}$  NMR spectrum of **2**.

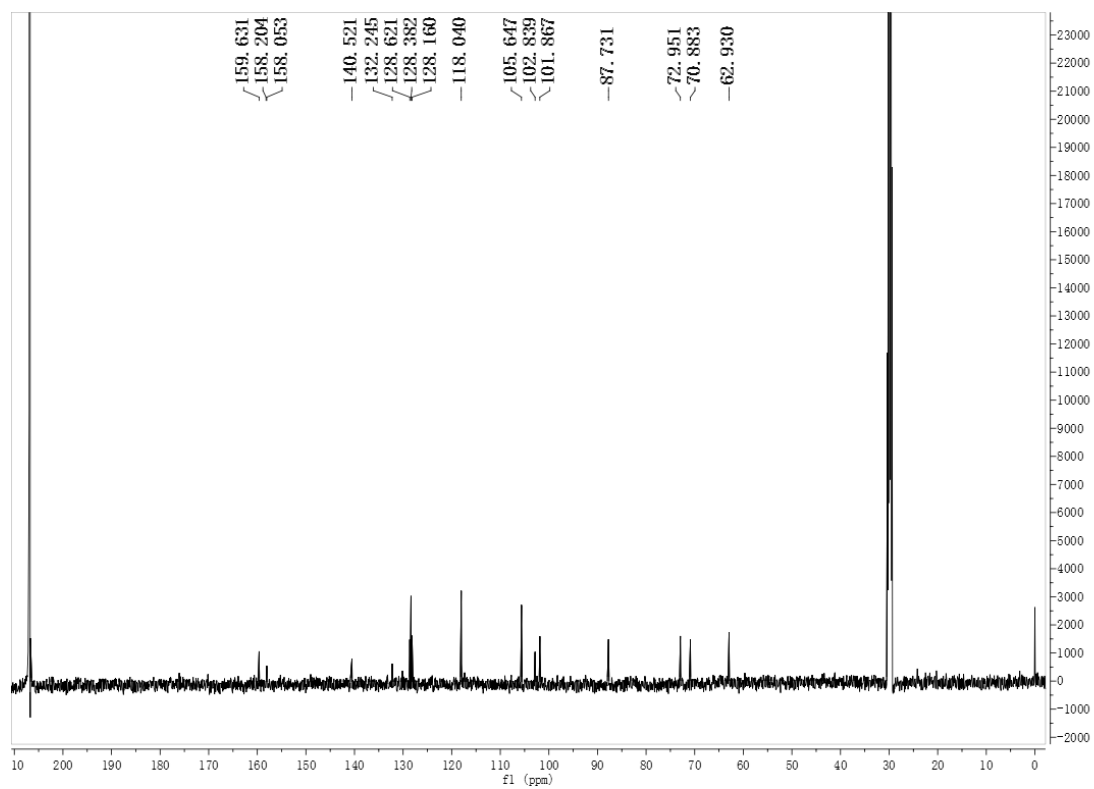

$^1\text{H}$ - $^1\text{H}$  COSY spectrum of **2**.

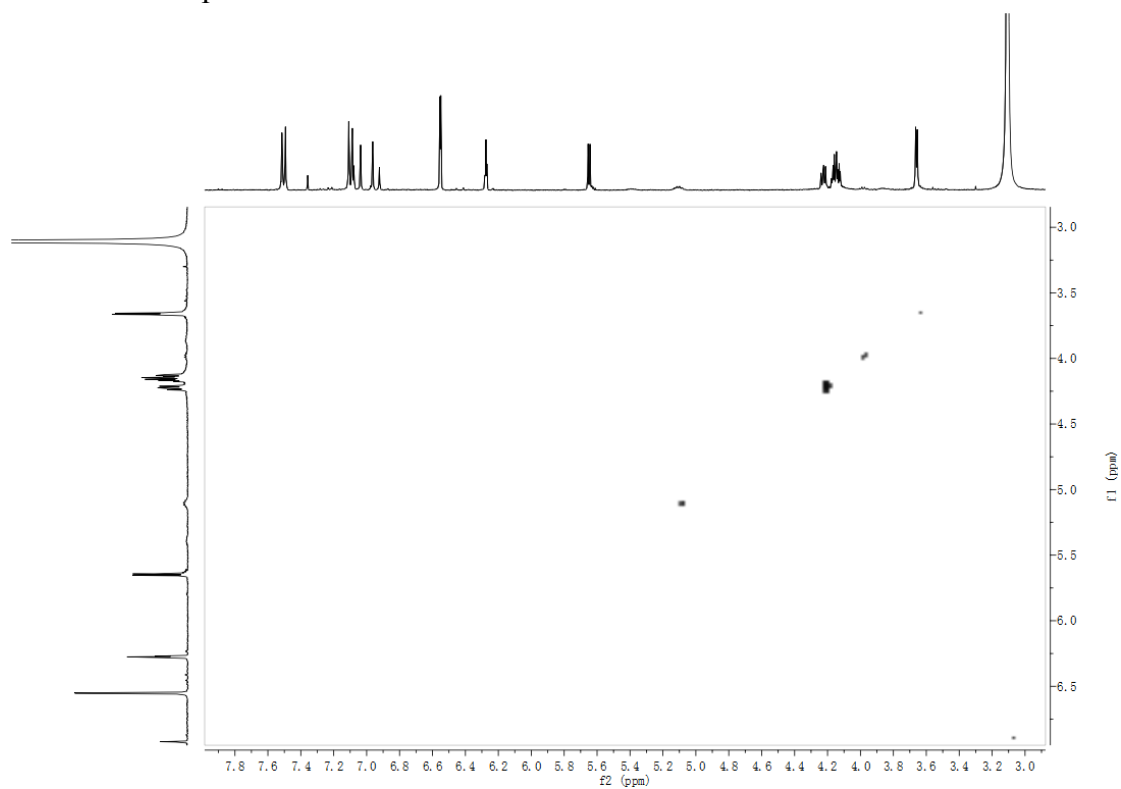

HMQC spectrum of **2**.

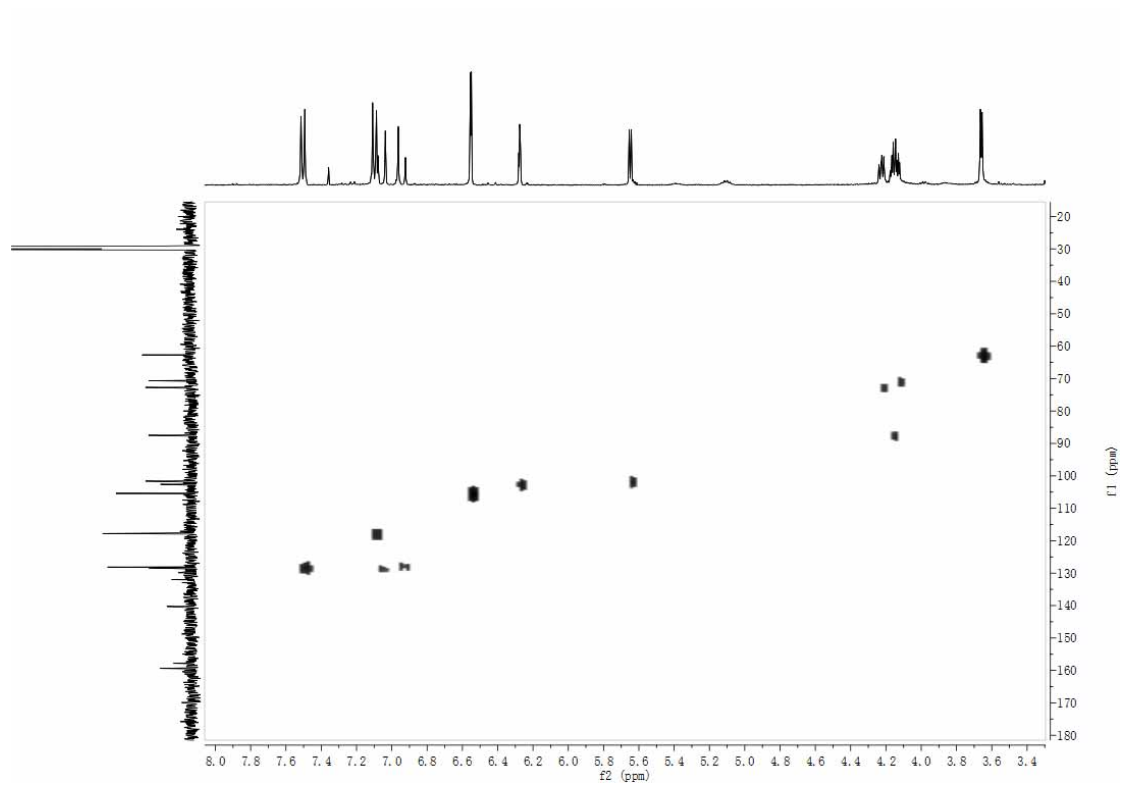

HMBC spectrum of **2**.

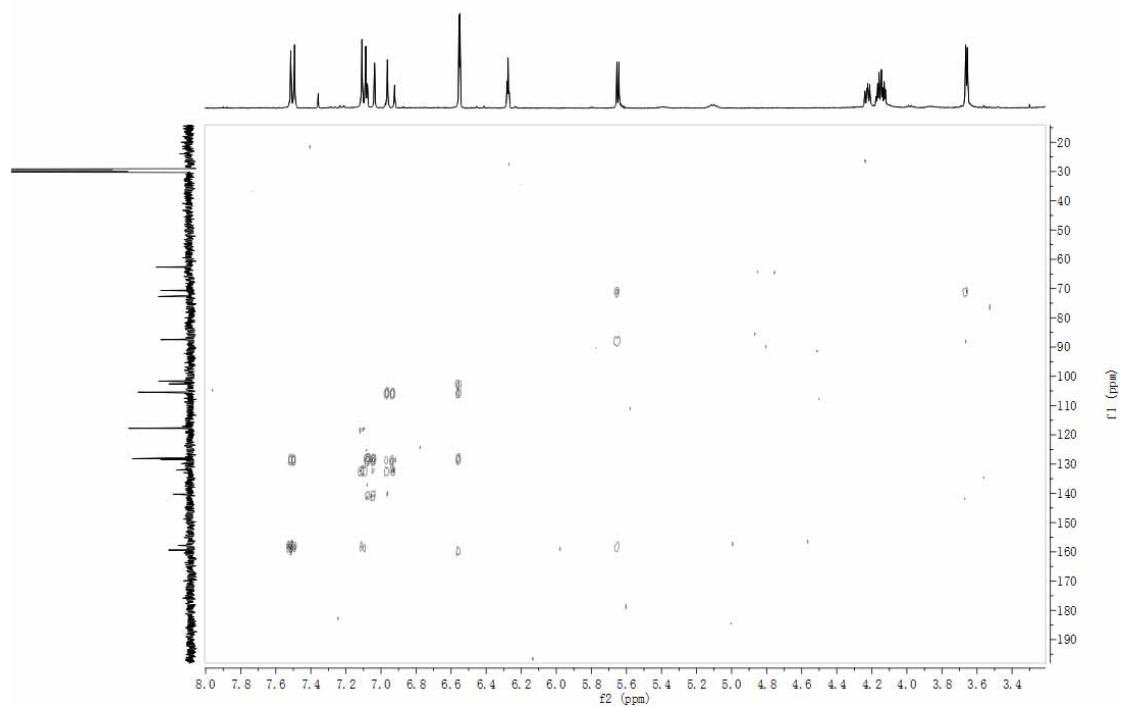

NOESY spectrum of **2**.

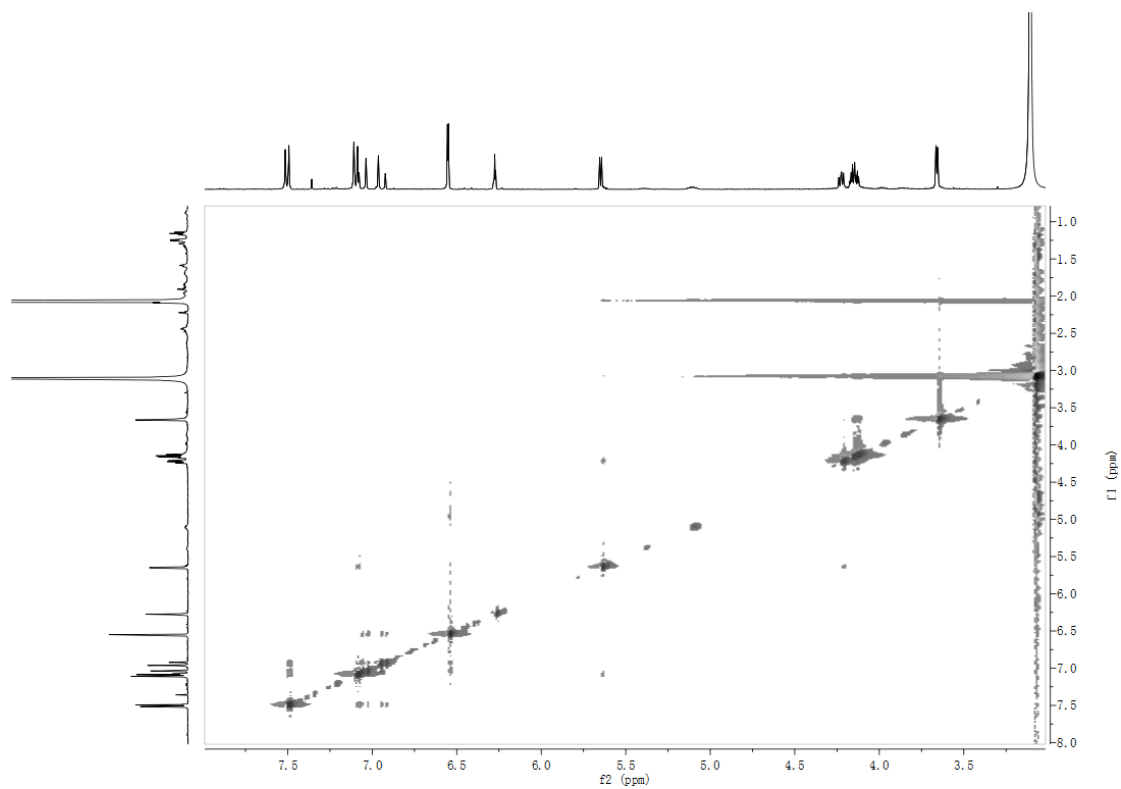

DEPT 135 spectrum of **2**.

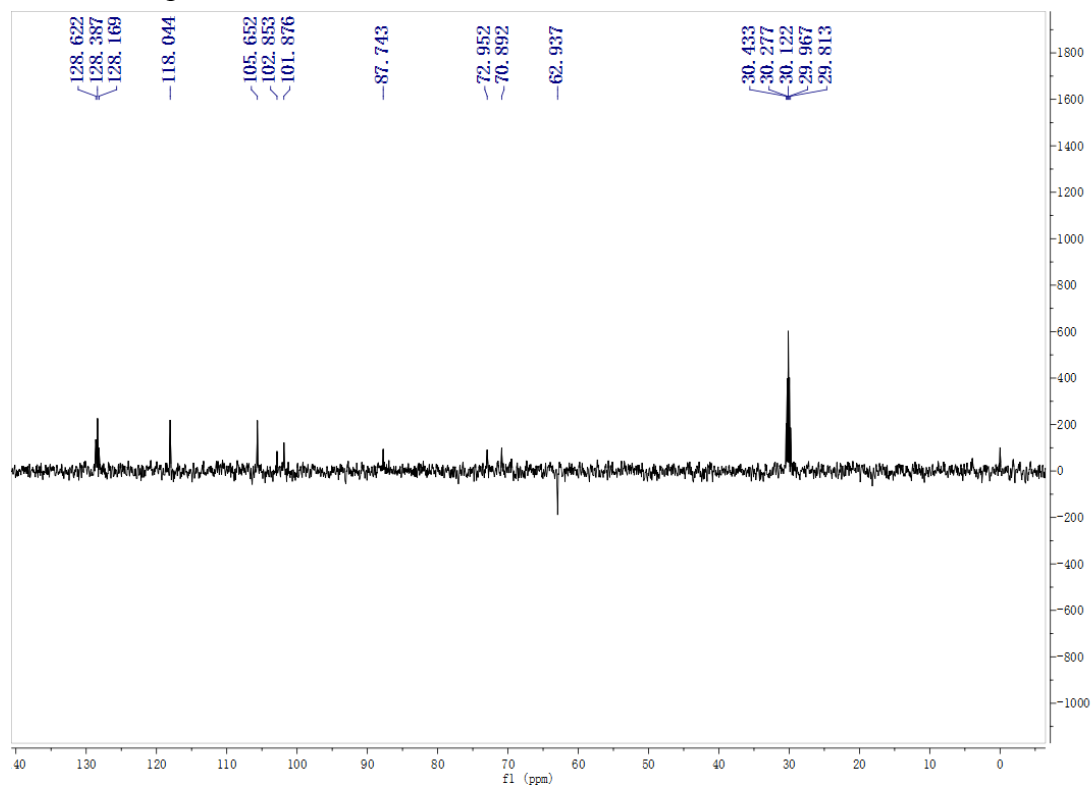

$^1\text{H}$  NMR spectrum of **3**.

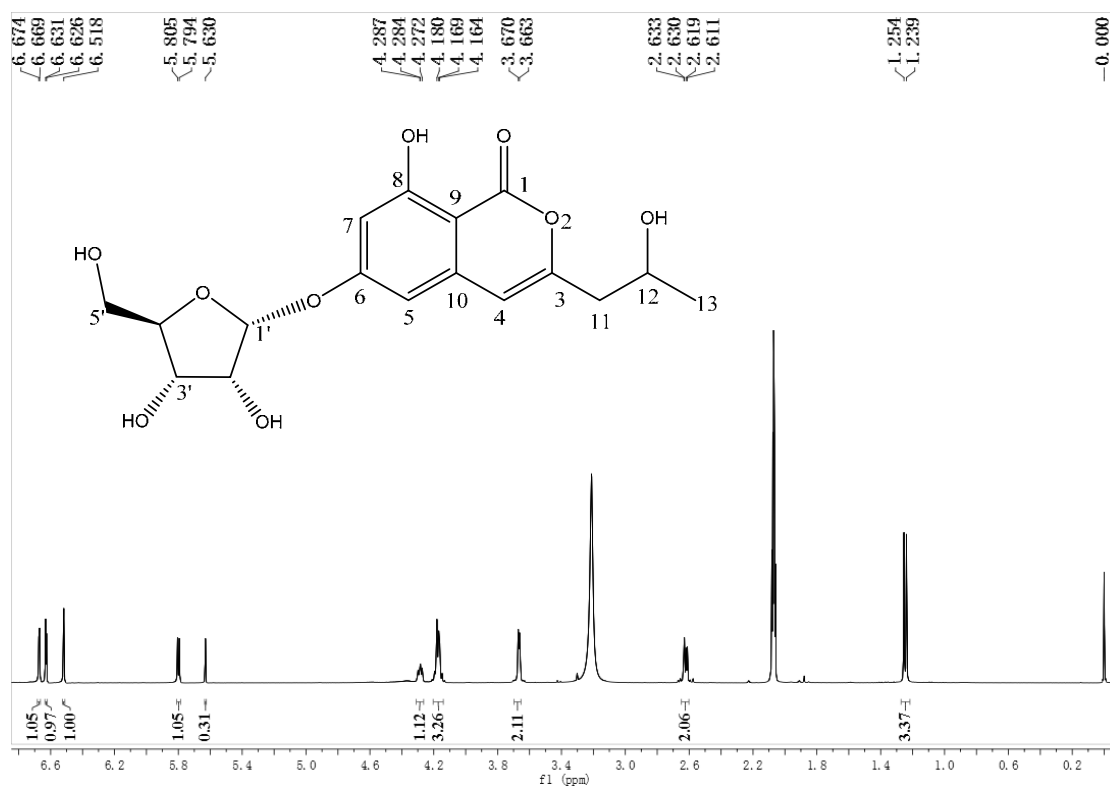

**<sup>13</sup>C NMR spectrum of 3.**

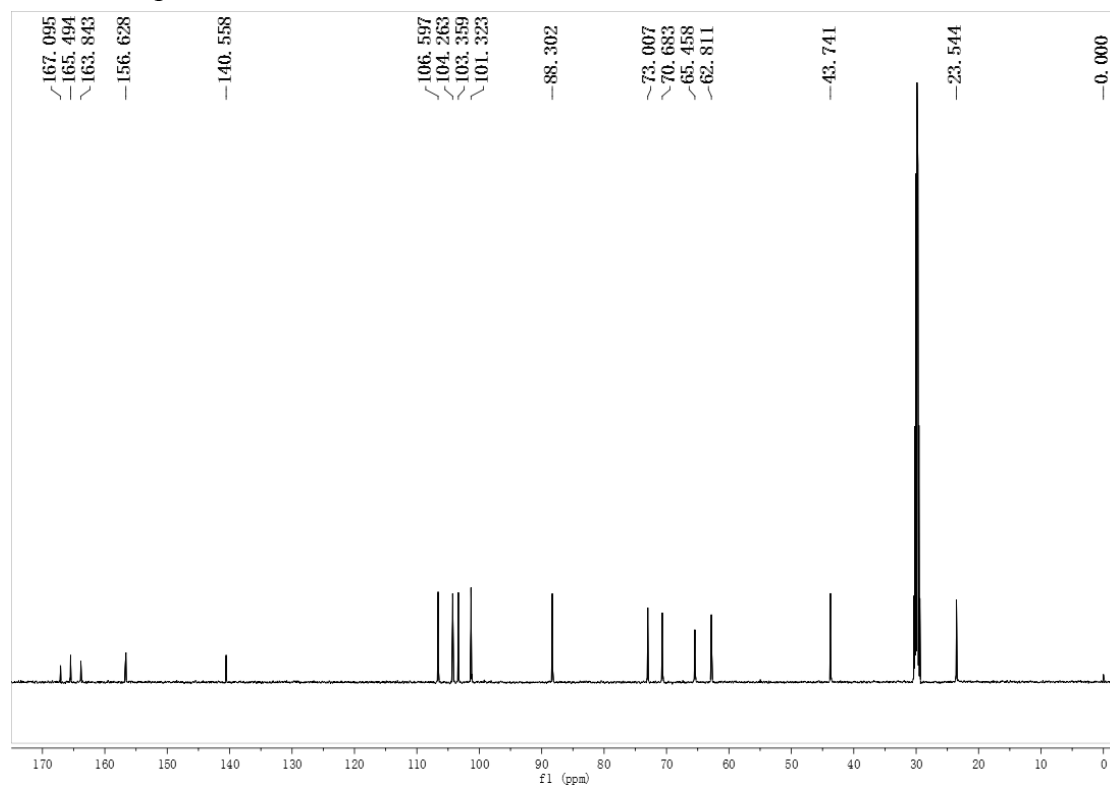

**DEPT 135 spectrum of 3.**

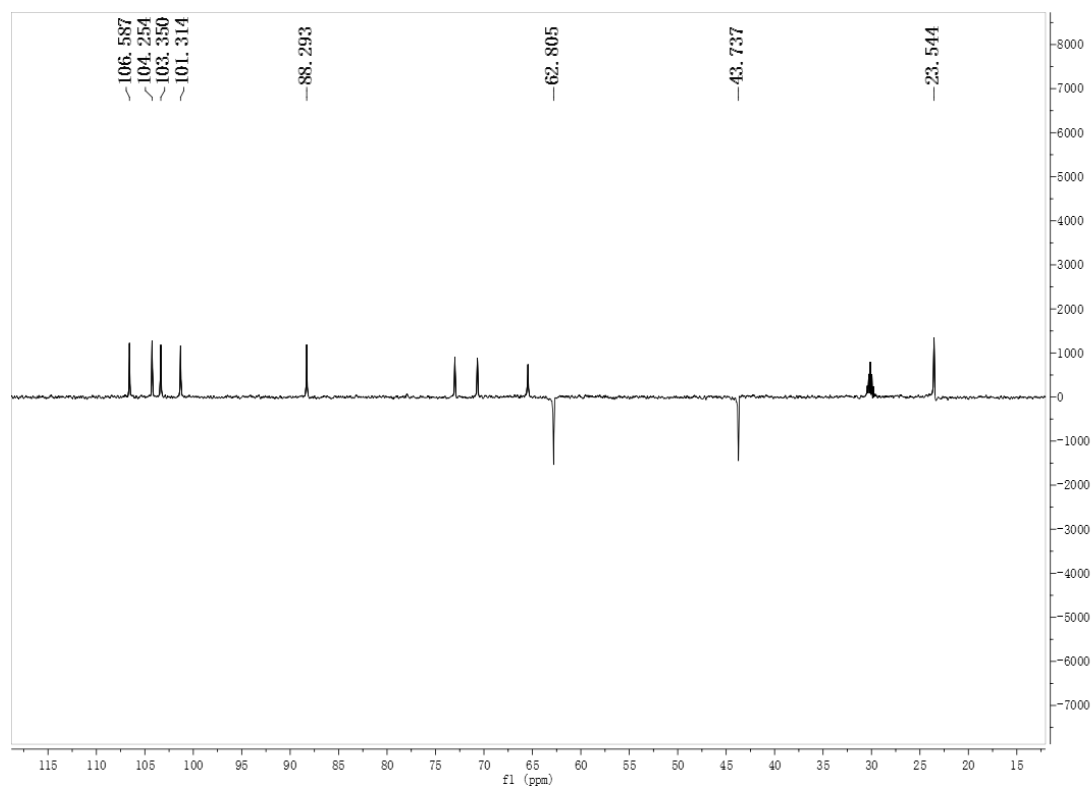

HMQC spectrum of **3**.

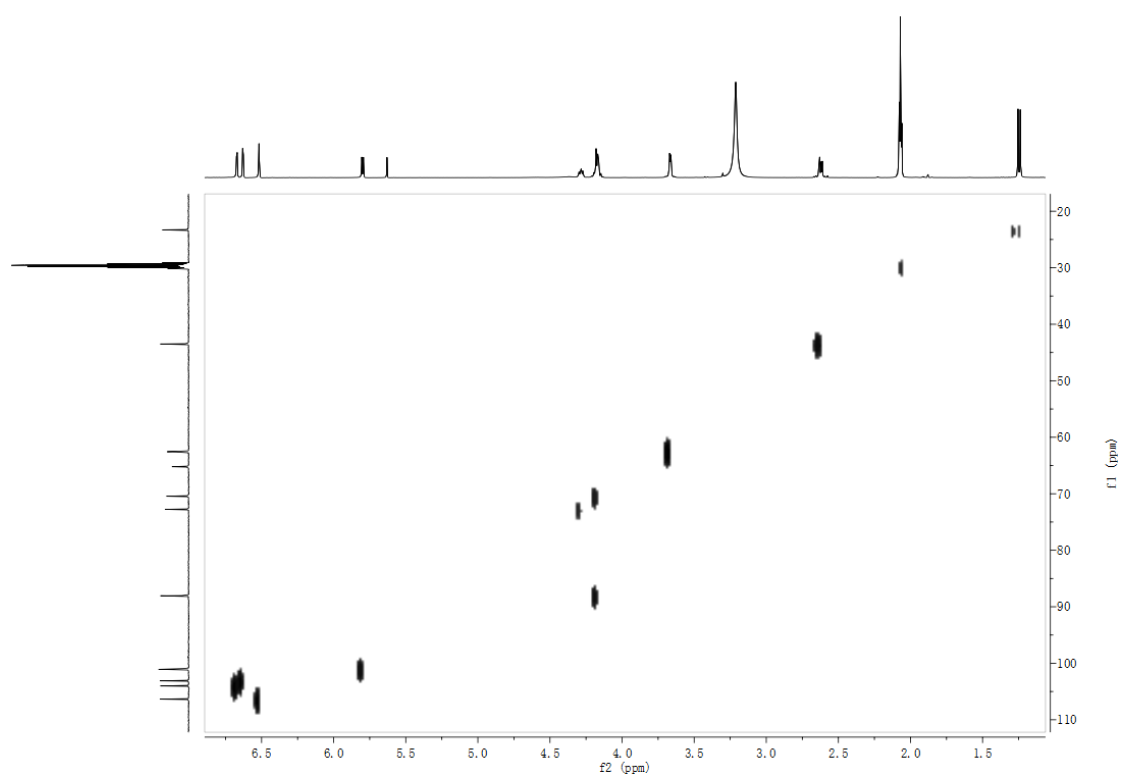

HMBC spectrum of **3**.

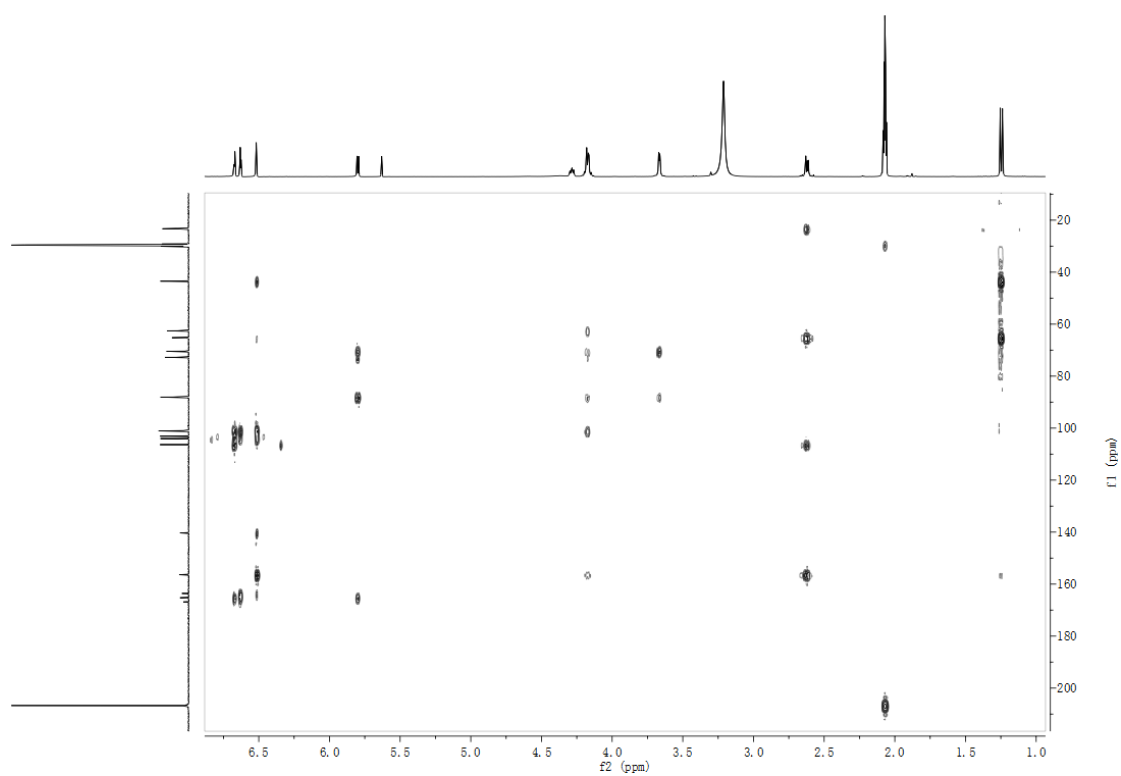

NOESY spectrum of **3**.

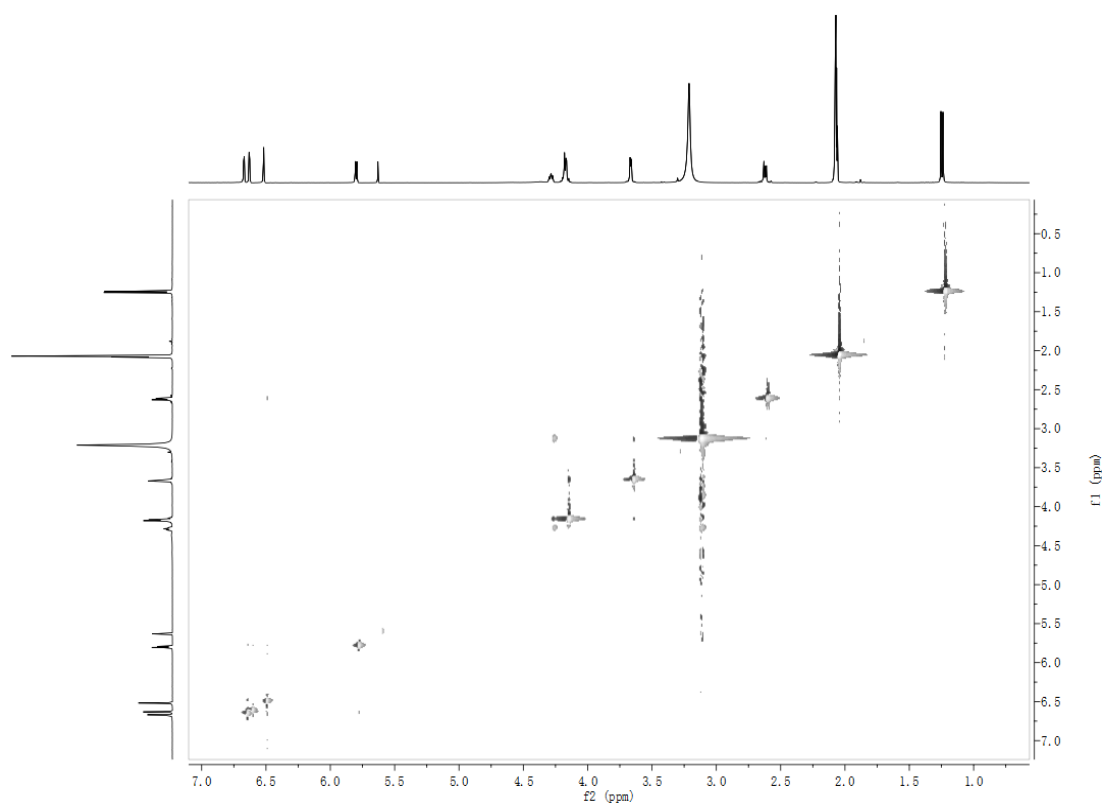



<sup>1</sup>H NMR spectrum of 4.

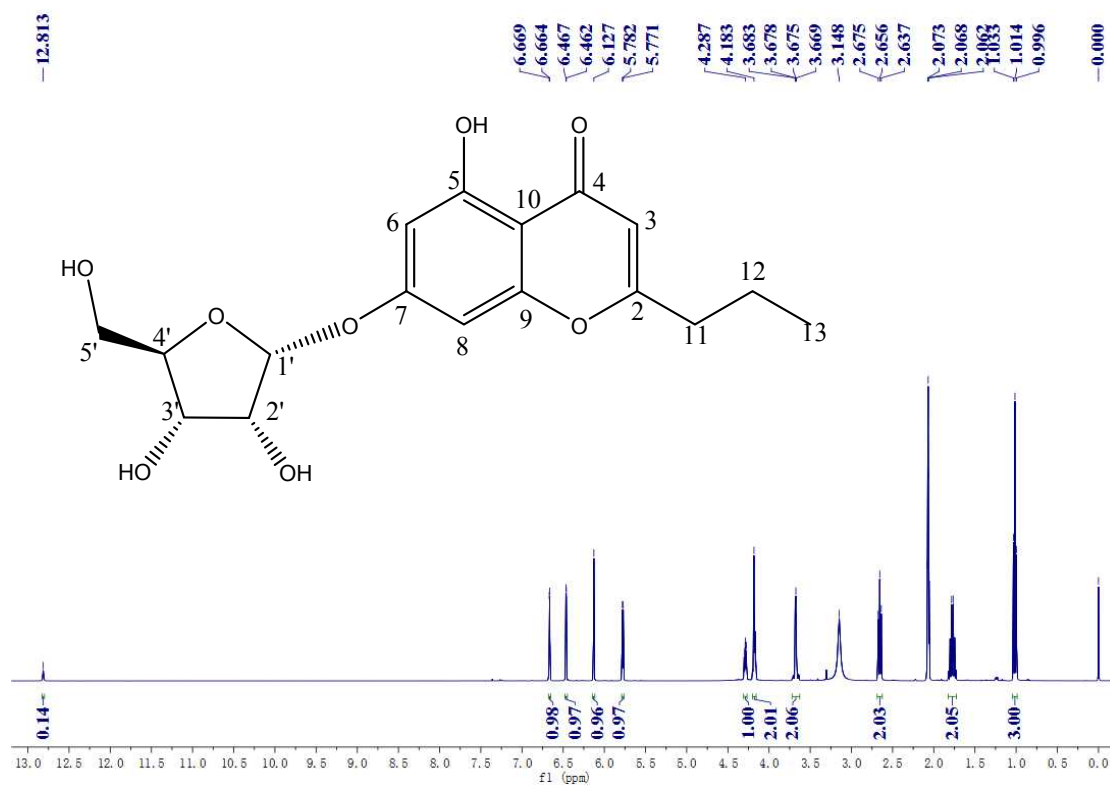

<sup>13</sup>C NMR spectrum of 4.

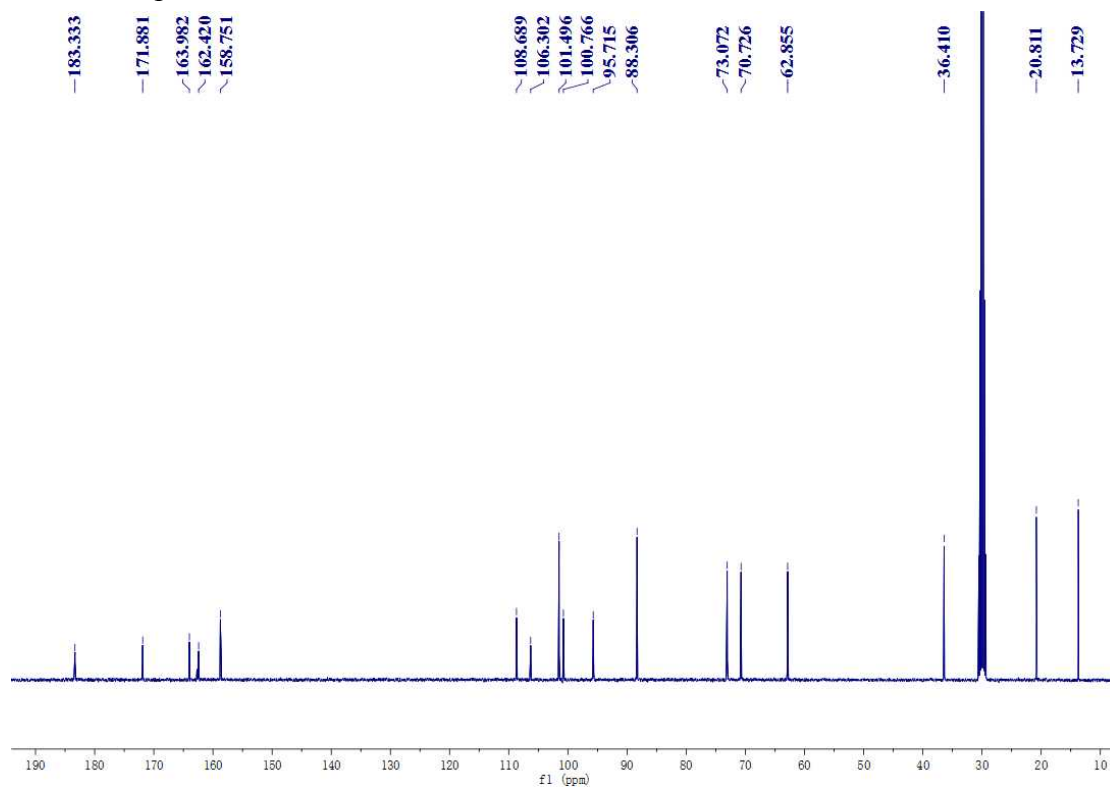

DEPT spectrum of 4.

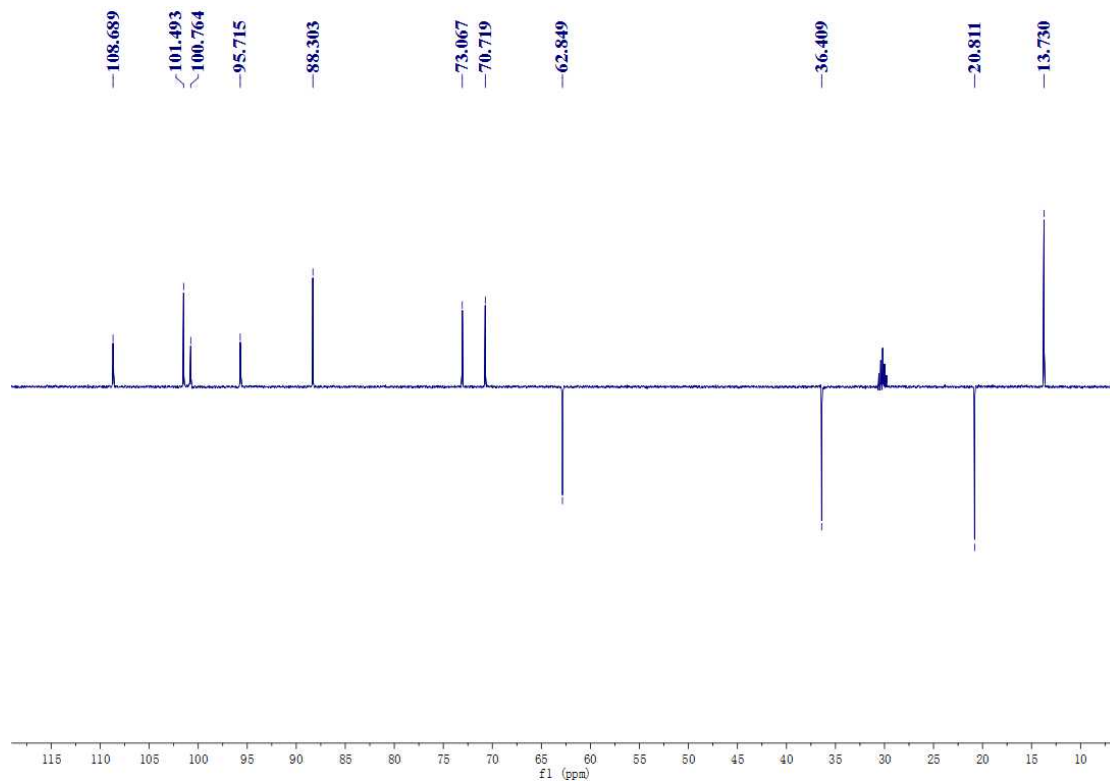

HSQC spectrum of 4.

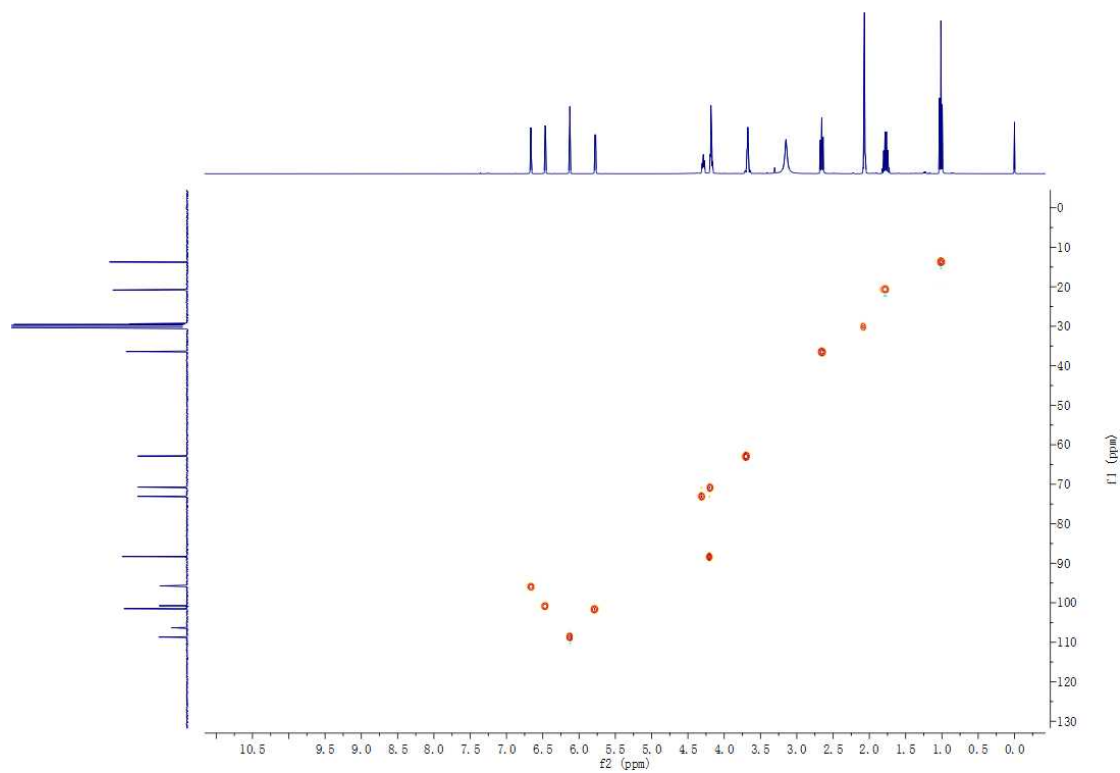

HMBC spectrum of 4.

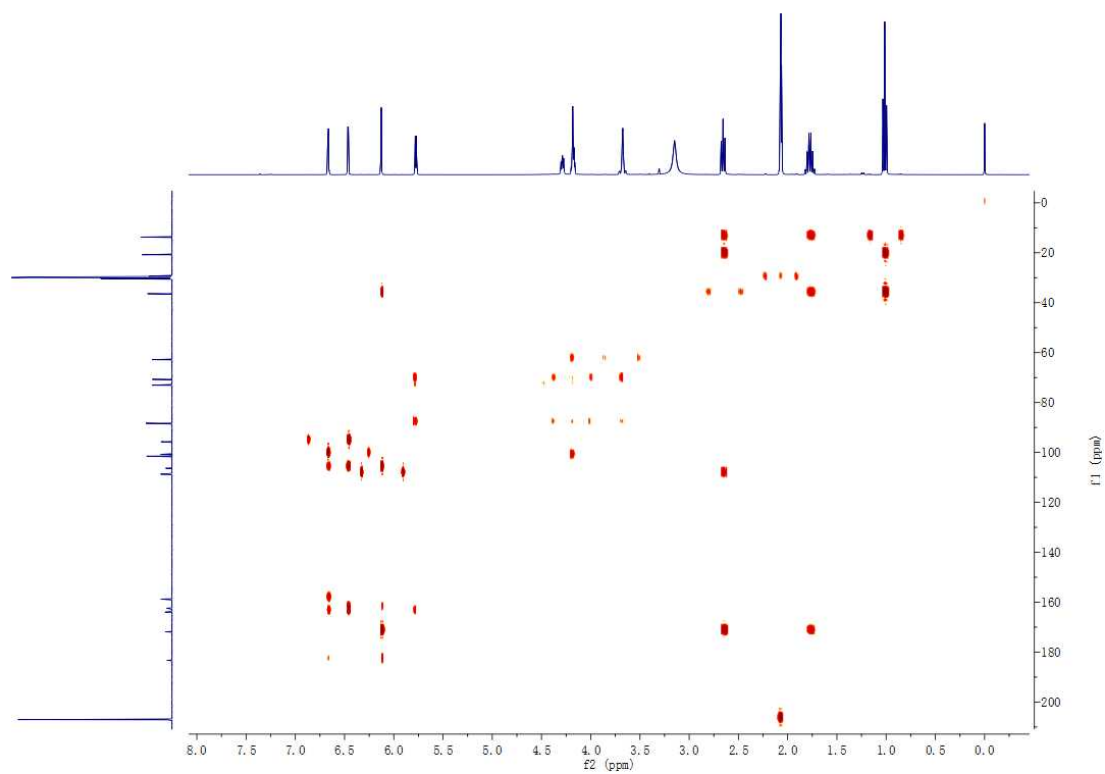

H-H COSY spectrum of 4.

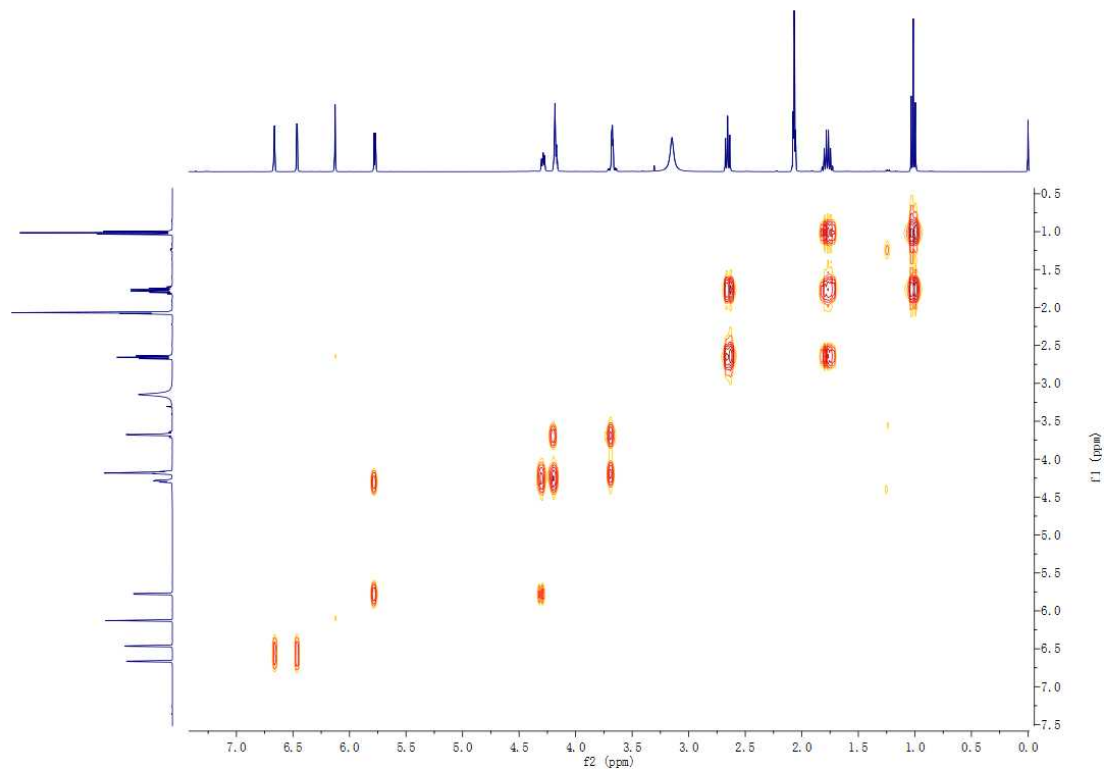

NOE spectrum of 4.

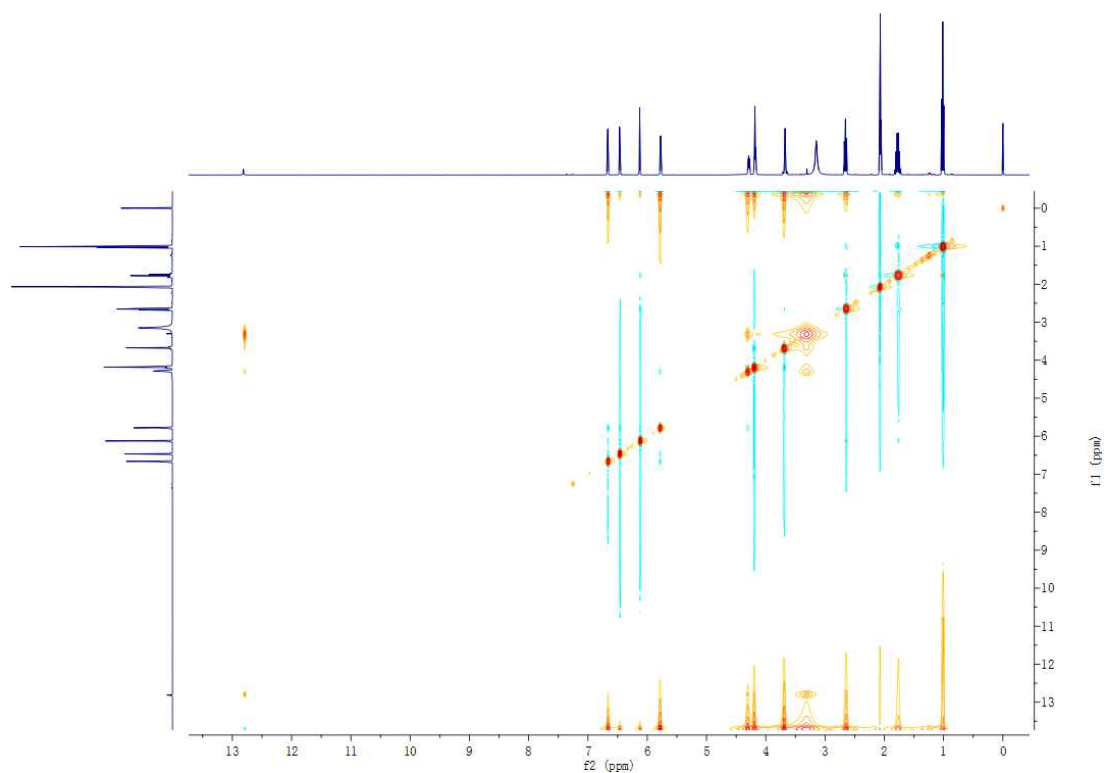

<sup>1</sup>H NMR spectrum of 5.

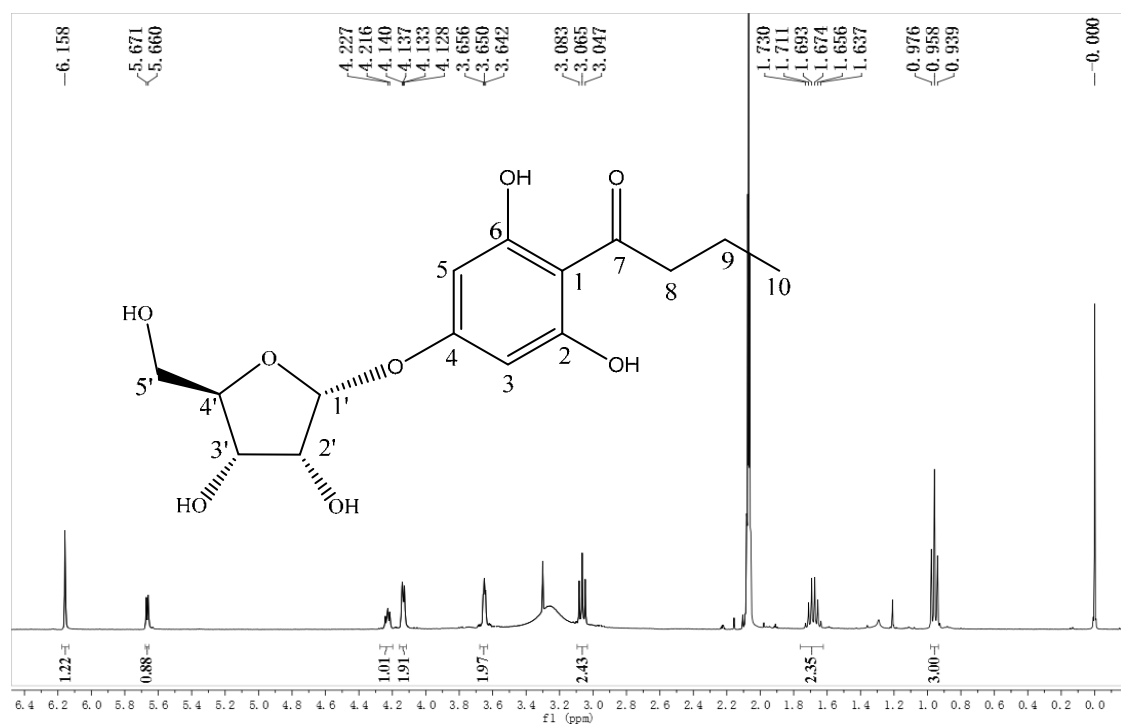

Supplement: c4ra12851f1.pdf [file c4ra12851f1.pdf]
